# Supplementary material for: Targeted Position Games: A Framework for Strategic Rank Optimization in Competitive Environments
Source: Research Square preprint supplement (doi:10.21203/rs.3.rs-7880175/v1), 2025-11-10
Supplement: Supplementary file 1 [file 070e98d36d4a644cae2f2ae5.xlsx]

## Sheet: rank_densities
scenario	n	sigma	seed	abs_deviation
Distinct targets	6	0.35	42	0
Distinct targets	6	0.35	42	0
Distinct targets	6	0.35	42	0
Distinct targets	6	0.35	42	0
Distinct targets	6	0.35	42	0
Distinct targets	6	0.35	42	0
Distinct targets	6	0.35	42	0
Distinct targets	6	0.35	42	0
Distinct targets	6	0.35	42	0
Distinct targets	6	0.35	42	0
Distinct targets	6	0.35	42	0
Distinct targets	6	0.35	42	0
Distinct targets	6	0.35	42	0
Distinct targets	6	0.35	42	0
Distinct targets	6	0.35	42	0
Distinct targets	6	0.35	42	0
Distinct targets	6	0.35	42	0
Distinct targets	6	0.35	42	0
Distinct targets	6	0.35	42	0
Distinct targets	6	0.35	42	0
Distinct targets	6	0.35	42	0
Distinct targets	6	0.35	42	0
Distinct targets	6	0.35	42	0
Distinct targets	6	0.35	42	0
Distinct targets	6	0.35	42	0
Distinct targets	6	0.35	42	0
Distinct targets	6	0.35	42	0
Distinct targets	6	0.35	42	0
Distinct targets	6	0.35	42	0
Distinct targets	6	0.35	42	0
Distinct targets	6	0.35	42	0
Distinct targets	6	0.35	42	0
Distinct targets	6	0.35	42	0
Distinct targets	6	0.35	42	0
Distinct targets	6	0.35	42	0
Distinct targets	6	0.35	42	0
Distinct targets	6	0.35	42	0
Distinct targets	6	0.35	42	0
Distinct targets	6	0.35	42	0
Distinct targets	6	0.35	42	0
Distinct targets	6	0.35	42	0
Distinct targets	6	0.35	42	0
Distinct targets	6	0.35	42	0
Distinct targets	6	0.35	42	0
Distinct targets	6	0.35	42	0
Distinct targets	6	0.35	42	0
Distinct targets	6	0.35	42	0
Distinct targets	6	0.35	42	0
Distinct targets	6	0.35	42	0
Distinct targets	6	0.35	42	0
Distinct targets	6	0.35	42	0
Distinct targets	6	0.35	42	0
Distinct targets	6	0.35	42	0
Distinct targets	6	0.35	42	0
Distinct targets	6	0.35	42	0
Distinct targets	6	0.35	42	0
Distinct targets	6	0.35	42	0
Distinct targets	6	0.35	42	0
Distinct targets	6	0.35	42	0
Distinct targets	6	0.35	42	0
Distinct targets	6	0.35	42	0
Distinct targets	6	0.35	42	0
Distinct targets	6	0.35	42	0
Distinct targets	6	0.35	42	0
Distinct targets	6	0.35	42	0
Distinct targets	6	0.35	42	0
Distinct targets	6	0.35	42	0
Distinct targets	6	0.35	42	0
Distinct targets	6	0.35	42	0
Distinct targets	6	0.35	42	0
Distinct targets	6	0.35	42	0
Distinct targets	6	0.35	42	0
Distinct targets	6	0.35	42	0
Distinct targets	6	0.35	42	0
Distinct targets	6	0.35	42	0
Distinct targets	6	0.35	42	0
Distinct targets	6	0.35	42	0
Distinct targets	6	0.35	42	0
Distinct targets	6	0.35	42	0
Distinct targets	6	0.35	42	0
Distinct targets	6	0.35	42	0
Distinct targets	6	0.35	42	0
Distinct targets	6	0.35	42	0
Distinct targets	6	0.35	42	0
Distinct targets	6	0.35	42	0
Distinct targets	6	0.35	42	0
Distinct targets	6	0.35	42	0
Distinct targets	6	0.35	42	0
Distinct targets	6	0.35	42	0
Distinct targets	6	0.35	42	0
Distinct targets	6	0.35	42	0
Distinct targets	6	0.35	42	0
Distinct targets	6	0.35	42	0
Distinct targets	6	0.35	42	0
Distinct targets	6	0.35	42	0
Distinct targets	6	0.35	42	0
Distinct targets	6	0.35	42	0
Distinct targets	6	0.35	42	0
Distinct targets	6	0.35	42	0
Distinct targets	6	0.35	42	0
Distinct targets	6	0.35	42	0
Distinct targets	6	0.35	42	0
Distinct targets	6	0.35	42	0
Distinct targets	6	0.35	42	0
Distinct targets	6	0.35	42	0
Distinct targets	6	0.35	42	0
Distinct targets	6	0.35	42	0
Distinct targets	6	0.35	42	0
Distinct targets	6	0.35	42	0
Distinct targets	6	0.35	42	0
Distinct targets	6	0.35	42	0
Distinct targets	6	0.35	42	0
Distinct targets	6	0.35	42	0
Distinct targets	6	0.35	42	0
Distinct targets	6	0.35	42	0
Distinct targets	6	0.35	42	0
Distinct targets	6	0.35	42	0
Distinct targets	6	0.35	42	0
Distinct targets	6	0.35	42	0
Distinct targets	6	0.35	42	0
Distinct targets	6	0.35	42	0
Distinct targets	6	0.35	42	0
Distinct targets	6	0.35	42	0
Distinct targets	6	0.35	42	0
Distinct targets	6	0.35	42	0
Distinct targets	6	0.35	42	0
Distinct targets	6	0.35	42	0
Distinct targets	6	0.35	42	0
Distinct targets	6	0.35	42	0
Distinct targets	6	0.35	42	0
Distinct targets	6	0.35	42	0
Distinct targets	6	0.35	42	0
Distinct targets	6	0.35	42	0
Distinct targets	6	0.35	42	0
Distinct targets	6	0.35	42	0
Distinct targets	6	0.35	42	0
Distinct targets	6	0.35	42	0
Distinct targets	6	0.35	42	0
Distinct targets	6	0.35	42	0
Distinct targets	6	0.35	42	0
Distinct targets	6	0.35	42	0
Distinct targets	6	0.35	42	0
Distinct targets	6	0.35	42	0
Distinct targets	6	0.35	42	0
Distinct targets	6	0.35	42	0
Distinct targets	6	0.35	42	0
Distinct targets	6	0.35	42	0
Distinct targets	6	0.35	42	0
Distinct targets	6	0.35	42	0
Distinct targets	6	0.35	42	0
Distinct targets	6	0.35	42	0
Distinct targets	6	0.35	42	0
Distinct targets	6	0.35	42	0
Distinct targets	6	0.35	42	0
Distinct targets	6	0.35	42	0
Distinct targets	6	0.35	42	0
Distinct targets	6	0.35	42	0
Distinct targets	6	0.35	42	0
Distinct targets	6	0.35	42	0
Distinct targets	6	0.35	42	0
Distinct targets	6	0.35	42	0
Distinct targets	6	0.35	42	0
Distinct targets	6	0.35	42	0
Distinct targets	6	0.35	42	0
Distinct targets	6	0.35	42	0
Distinct targets	6	0.35	42	0
Distinct targets	6	0.35	42	0
Distinct targets	6	0.35	42	0
Distinct targets	6	0.35	42	0
Distinct targets	6	0.35	42	0
Distinct targets	6	0.35	42	0
Distinct targets	6	0.35	42	0
Distinct targets	6	0.35	42	0
Distinct targets	6	0.35	42	0
Distinct targets	6	0.35	42	0
Distinct targets	6	0.35	42	0
Distinct targets	6	0.35	42	0
Distinct targets	6	0.35	42	0
Distinct targets	6	0.35	42	0
Distinct targets	6	0.35	42	0
Distinct targets	6	0.35	42	0
Distinct targets	6	0.35	42	0
Distinct targets	6	0.35	42	0
Distinct targets	6	0.35	42	0
Distinct targets	6	0.35	42	0
Distinct targets	6	0.35	42	0
Distinct targets	6	0.35	42	0
Distinct targets	6	0.35	42	0
Distinct targets	6	0.35	42	1
Distinct targets	6	0.35	42	1
Distinct targets	6	0.35	42	0
Distinct targets	6	0.35	42	0
Distinct targets	6	0.35	42	0
Distinct targets	6	0.35	42	0
Distinct targets	6	0.35	42	0
Distinct targets	6	0.35	42	0
Distinct targets	6	0.35	42	0
Distinct targets	6	0.35	42	0
Distinct targets	6	0.35	42	0
Distinct targets	6	0.35	42	0
Distinct targets	6	0.35	42	0
Distinct targets	6	0.35	42	0
Distinct targets	6	0.35	42	0
Distinct targets	6	0.35	42	0
Distinct targets	6	0.35	42	0
Distinct targets	6	0.35	42	0
Distinct targets	6	0.35	42	0
Distinct targets	6	0.35	42	0
Distinct targets	6	0.35	42	0
Distinct targets	6	0.35	42	0
Distinct targets	6	0.35	42	0
Distinct targets	6	0.35	42	0
Distinct targets	6	0.35	42	0
Distinct targets	6	0.35	42	0
Distinct targets	6	0.35	42	0
Distinct targets	6	0.35	42	0
Distinct targets	6	0.35	42	0
Distinct targets	6	0.35	42	0
Distinct targets	6	0.35	42	0
Distinct targets	6	0.35	42	0
Distinct targets	6	0.35	42	0
Distinct targets	6	0.35	42	0
Distinct targets	6	0.35	42	0
Distinct targets	6	0.35	42	0
Distinct targets	6	0.35	42	0
Distinct targets	6	0.35	42	0
Distinct targets	6	0.35	42	0
Distinct targets	6	0.35	42	0
Distinct targets	6	0.35	42	0
Distinct targets	6	0.35	42	0
Distinct targets	6	0.35	42	0
Distinct targets	6	0.35	42	0
Distinct targets	6	0.35	42	0
Distinct targets	6	0.35	42	0
Distinct targets	6	0.35	42	0
Distinct targets	6	0.35	42	0
Distinct targets	6	0.35	42	0
Distinct targets	6	0.35	42	0
Distinct targets	6	0.35	42	0
Distinct targets	6	0.35	42	0
Distinct targets	6	0.35	42	0
Distinct targets	6	0.35	42	0
Distinct targets	6	0.35	42	0
Distinct targets	6	0.35	42	1
Distinct targets	6	0.35	42	1
Distinct targets	6	0.35	42	0
Distinct targets	6	0.35	42	1
Distinct targets	6	0.35	42	1
Distinct targets	6	0.35	42	0
Distinct targets	6	0.35	42	0
Distinct targets	6	0.35	42	0
Distinct targets	6	0.35	42	0
Distinct targets	6	0.35	42	0
Distinct targets	6	0.35	42	0
Distinct targets	6	0.35	42	0
Distinct targets	6	0.35	42	0
Distinct targets	6	0.35	42	0
Distinct targets	6	0.35	42	0
Distinct targets	6	0.35	42	0
Distinct targets	6	0.35	42	0
Distinct targets	6	0.35	42	0
Distinct targets	6	0.35	42	0
Distinct targets	6	0.35	42	0
Distinct targets	6	0.35	42	0
Distinct targets	6	0.35	42	0
Distinct targets	6	0.35	42	0
Distinct targets	6	0.35	42	0
Distinct targets	6	0.35	42	0
Distinct targets	6	0.35	42	0
Distinct targets	6	0.35	42	0
Distinct targets	6	0.35	42	0
Distinct targets	6	0.35	42	0
Distinct targets	6	0.35	42	0
Distinct targets	6	0.35	42	0
Distinct targets	6	0.35	42	0
Distinct targets	6	0.35	42	0
Distinct targets	6	0.35	42	0
Distinct targets	6	0.35	42	0
Distinct targets	6	0.35	42	0
Distinct targets	6	0.35	42	0
Distinct targets	6	0.35	42	0
Distinct targets	6	0.35	42	0
Distinct targets	6	0.35	42	0
Distinct targets	6	0.35	42	0
Distinct targets	6	0.35	42	0
Distinct targets	6	0.35	42	0
Distinct targets	6	0.35	42	0
Distinct targets	6	0.35	42	0
Distinct targets	6	0.35	42	0
Distinct targets	6	0.35	42	0
Distinct targets	6	0.35	42	0
Distinct targets	6	0.35	42	0
Distinct targets	6	0.35	42	0
Distinct targets	6	0.35	42	0
Distinct targets	6	0.35	42	0
Distinct targets	6	0.35	42	0
Distinct targets	6	0.35	42	0
Distinct targets	6	0.35	42	0
Distinct targets	6	0.35	42	0
Distinct targets	6	0.35	42	0
Distinct targets	6	0.35	42	0
Distinct targets	6	0.35	42	0
Distinct targets	6	0.35	42	0
Distinct targets	6	0.35	42	0
Distinct targets	6	0.35	42	0
Distinct targets	6	0.35	42	0
Distinct targets	6	0.35	42	0
Distinct targets	6	0.35	42	0
Distinct targets	6	0.35	42	0
Distinct targets	6	0.35	42	0
Distinct targets	6	0.35	42	0
Distinct targets	6	0.35	42	0
Distinct targets	6	0.35	42	0
Distinct targets	6	0.35	42	0
Distinct targets	6	0.35	42	0
Distinct targets	6	0.35	42	0
Distinct targets	6	0.35	42	0
Distinct targets	6	0.35	42	0
Distinct targets	6	0.35	42	0
Distinct targets	6	0.35	42	0
Distinct targets	6	0.35	42	0
Distinct targets	6	0.35	42	0
Distinct targets	6	0.35	42	0
Distinct targets	6	0.35	42	0
Distinct targets	6	0.35	42	0
Distinct targets	6	0.35	42	0
Distinct targets	6	0.35	42	0
Distinct targets	6	0.35	42	0
Distinct targets	6	0.35	42	0
Distinct targets	6	0.35	42	0
Distinct targets	6	0.35	42	0
Distinct targets	6	0.35	42	0
Distinct targets	6	0.35	42	0
Distinct targets	6	0.35	42	0
Distinct targets	6	0.35	42	0
Distinct targets	6	0.35	42	0
Distinct targets	6	0.35	42	0
Distinct targets	6	0.35	42	0
Distinct targets	6	0.35	42	0
Distinct targets	6	0.35	42	0
Distinct targets	6	0.35	42	0
Distinct targets	6	0.35	42	0
Distinct targets	6	0.35	42	0
Distinct targets	6	0.35	42	0
Distinct targets	6	0.35	42	0
Distinct targets	6	0.35	42	0
Distinct targets	6	0.35	42	0
Distinct targets	6	0.35	42	0
Distinct targets	6	0.35	42	1
Distinct targets	6	0.35	42	1
Distinct targets	6	0.35	42	0
Distinct targets	6	0.35	42	0
Distinct targets	6	0.35	42	0
Distinct targets	6	0.35	42	0
Distinct targets	6	0.35	42	0
Distinct targets	6	0.35	42	0
Distinct targets	6	0.35	42	0
Distinct targets	6	0.35	42	0
Distinct targets	6	0.35	42	0
Distinct targets	6	0.35	42	0
Distinct targets	6	0.35	42	0
Distinct targets	6	0.35	42	0
Distinct targets	6	0.35	42	0
Distinct targets	6	0.35	42	0
Distinct targets	6	0.35	42	0
Distinct targets	6	0.35	42	0
Distinct targets	6	0.35	42	0
Distinct targets	6	0.35	42	0
Distinct targets	6	0.35	42	0
Distinct targets	6	0.35	42	0
Distinct targets	6	0.35	42	0
Distinct targets	6	0.35	42	0
Distinct targets	6	0.35	42	0
Distinct targets	6	0.35	42	0
Distinct targets	6	0.35	42	0
Distinct targets	6	0.35	42	0
Distinct targets	6	0.35	42	0
Distinct targets	6	0.35	42	0
Distinct targets	6	0.35	42	0
Distinct targets	6	0.35	42	0
Distinct targets	6	0.35	42	0
Distinct targets	6	0.35	42	0
Distinct targets	6	0.35	42	0
Distinct targets	6	0.35	42	0
Distinct targets	6	0.35	42	0
Distinct targets	6	0.35	42	0
Distinct targets	6	0.35	42	0
Distinct targets	6	0.35	42	0
Distinct targets	6	0.35	42	0
Distinct targets	6	0.35	42	0
Distinct targets	6	0.35	42	0
Distinct targets	6	0.35	42	0
Distinct targets	6	0.35	42	0
Distinct targets	6	0.35	42	0
Distinct targets	6	0.35	42	0
Distinct targets	6	0.35	42	0
Distinct targets	6	0.35	42	0
Distinct targets	6	0.35	42	0
Distinct targets	6	0.35	42	0
Distinct targets	6	0.35	42	0
Distinct targets	6	0.35	42	0
Distinct targets	6	0.35	42	0
Distinct targets	6	0.35	42	0
Distinct targets	6	0.35	42	0
Distinct targets	6	0.35	42	0
Distinct targets	6	0.35	42	0
Distinct targets	6	0.35	42	0
Distinct targets	6	0.35	42	0
Distinct targets	6	0.35	42	0
Distinct targets	6	0.35	42	0
Distinct targets	6	0.35	42	0
Distinct targets	6	0.35	42	0
Distinct targets	6	0.35	42	0
Distinct targets	6	0.35	42	0
Distinct targets	6	0.35	42	0
Distinct targets	6	0.35	42	0
Distinct targets	6	0.35	42	0
Distinct targets	6	0.35	42	0
Distinct targets	6	0.35	42	0
Distinct targets	6	0.35	42	0
Distinct targets	6	0.35	42	0
Distinct targets	6	0.35	42	0
Distinct targets	6	0.35	42	0
Distinct targets	6	0.35	42	0
Distinct targets	6	0.35	42	0
Distinct targets	6	0.35	42	0
Distinct targets	6	0.35	42	0
Distinct targets	6	0.35	42	0
Distinct targets	6	0.35	42	0
Distinct targets	6	0.35	42	0
Distinct targets	6	0.35	42	0
Distinct targets	6	0.35	42	0
Distinct targets	6	0.35	42	0
Distinct targets	6	0.35	42	0
Distinct targets	6	0.35	42	0
Distinct targets	6	0.35	42	0
Distinct targets	6	0.35	42	0
Distinct targets	6	0.35	42	0
Distinct targets	6	0.35	42	0
Distinct targets	6	0.35	42	0
Distinct targets	6	0.35	42	0
Distinct targets	6	0.35	42	0
Distinct targets	6	0.35	42	0
Distinct targets	6	0.35	42	0
Distinct targets	6	0.35	42	0
Distinct targets	6	0.35	42	0
Distinct targets	6	0.35	42	0
Distinct targets	6	0.35	42	0
Distinct targets	6	0.35	42	0
Distinct targets	6	0.35	42	0
Distinct targets	6	0.35	42	0
Distinct targets	6	0.35	42	0
Distinct targets	6	0.35	42	0
Distinct targets	6	0.35	42	0
Distinct targets	6	0.35	42	0
Distinct targets	6	0.35	42	0
Distinct targets	6	0.35	42	0
Distinct targets	6	0.35	42	0
Distinct targets	6	0.35	42	0
Distinct targets	6	0.35	42	0
Distinct targets	6	0.35	42	0
Distinct targets	6	0.35	42	0
Distinct targets	6	0.35	42	0
Distinct targets	6	0.35	42	0
Distinct targets	6	0.35	42	0
Distinct targets	6	0.35	42	0
Distinct targets	6	0.35	42	0
Distinct targets	6	0.35	42	0
Distinct targets	6	0.35	42	0
Distinct targets	6	0.35	42	0
Distinct targets	6	0.35	42	0
Distinct targets	6	0.35	42	0
Distinct targets	6	0.35	42	0
Distinct targets	6	0.35	42	0
Distinct targets	6	0.35	42	0
Distinct targets	6	0.35	42	0
Distinct targets	6	0.35	42	0
Distinct targets	6	0.35	42	0
Distinct targets	6	0.35	42	0
Distinct targets	6	0.35	42	0
Distinct targets	6	0.35	42	0
Distinct targets	6	0.35	42	0
Distinct targets	6	0.35	42	0
Distinct targets	6	0.35	42	0
Distinct targets	6	0.35	42	0
Distinct targets	6	0.35	42	0
Distinct targets	6	0.35	42	0
Distinct targets	6	0.35	42	0
Distinct targets	6	0.35	42	0
Distinct targets	6	0.35	42	0
Distinct targets	6	0.35	42	0
Distinct targets	6	0.35	42	0
Distinct targets	6	0.35	42	0
Distinct targets	6	0.35	42	0
Distinct targets	6	0.35	42	0
Distinct targets	6	0.35	42	0
Distinct targets	6	0.35	42	0
Distinct targets	6	0.35	42	0
Distinct targets	6	0.35	42	0
Distinct targets	6	0.35	42	1
Distinct targets	6	0.35	42	1
Distinct targets	6	0.35	42	0
Distinct targets	6	0.35	42	0
Distinct targets	6	0.35	42	0
Distinct targets	6	0.35	42	0
Distinct targets	6	0.35	42	1
Distinct targets	6	0.35	42	1
Distinct targets	6	0.35	42	0
Distinct targets	6	0.35	42	0
Distinct targets	6	0.35	42	0
Distinct targets	6	0.35	42	0
Distinct targets	6	0.35	42	0
Distinct targets	6	0.35	42	0
Distinct targets	6	0.35	42	0
Distinct targets	6	0.35	42	0
Distinct targets	6	0.35	42	0
Distinct targets	6	0.35	42	0
Distinct targets	6	0.35	42	0
Distinct targets	6	0.35	42	0
Distinct targets	6	0.35	42	0
Distinct targets	6	0.35	42	0
Distinct targets	6	0.35	42	0
Distinct targets	6	0.35	42	0
Distinct targets	6	0.35	42	0
Distinct targets	6	0.35	42	0
Distinct targets	6	0.35	42	0
Distinct targets	6	0.35	42	0
Distinct targets	6	0.35	42	0
Distinct targets	6	0.35	42	0
Distinct targets	6	0.35	42	0
Distinct targets	6	0.35	42	0
Distinct targets	6	0.35	42	0
Distinct targets	6	0.35	42	0
Distinct targets	6	0.35	42	0
Distinct targets	6	0.35	42	0
Distinct targets	6	0.35	42	0
Distinct targets	6	0.35	42	0
Distinct targets	6	0.35	42	0
Distinct targets	6	0.35	42	0
Distinct targets	6	0.35	42	0
Distinct targets	6	0.35	42	0
Distinct targets	6	0.35	42	0
Distinct targets	6	0.35	42	0
Distinct targets	6	0.35	42	0
Distinct targets	6	0.35	42	0
Distinct targets	6	0.35	42	0
Distinct targets	6	0.35	42	0
Distinct targets	6	0.35	42	0
Distinct targets	6	0.35	42	0
Distinct targets	6	0.35	42	0
Distinct targets	6	0.35	42	0
Distinct targets	6	0.35	42	0
Distinct targets	6	0.35	42	0
Distinct targets	6	0.35	42	0
Distinct targets	6	0.35	42	0
Distinct targets	6	0.35	42	0
Distinct targets	6	0.35	42	0
Distinct targets	6	0.35	42	0
Distinct targets	6	0.35	42	0
Distinct targets	6	0.35	42	0
Distinct targets	6	0.35	42	0
Distinct targets	6	0.35	42	0
Distinct targets	6	0.35	42	0
Distinct targets	6	0.35	42	0
Distinct targets	6	0.35	42	0
Distinct targets	6	0.35	42	0
Distinct targets	6	0.35	42	0
Distinct targets	6	0.35	42	0
Distinct targets	6	0.35	42	0
Distinct targets	6	0.35	42	0
Distinct targets	6	0.35	42	0
Distinct targets	6	0.35	42	0
Distinct targets	6	0.35	42	0
Distinct targets	6	0.35	42	0
Distinct targets	6	0.35	42	0
Distinct targets	6	0.35	42	0
Distinct targets	6	0.35	42	0
Distinct targets	6	0.35	42	0
Distinct targets	6	0.35	42	0
Distinct targets	6	0.35	42	0
Distinct targets	6	0.35	42	0
Distinct targets	6	0.35	42	0
Distinct targets	6	0.35	42	0
Distinct targets	6	0.35	42	0
Distinct targets	6	0.35	42	0
Distinct targets	6	0.35	42	0
Distinct targets	6	0.35	42	0
Distinct targets	6	0.35	42	0
Distinct targets	6	0.35	42	0
Distinct targets	6	0.35	42	0
Distinct targets	6	0.35	42	0
Distinct targets	6	0.35	42	0
Distinct targets	6	0.35	42	0
Distinct targets	6	0.35	42	0
Distinct targets	6	0.35	42	0
Distinct targets	6	0.35	42	0
Distinct targets	6	0.35	42	0
Distinct targets	6	0.35	42	0
Distinct targets	6	0.35	42	0
Distinct targets	6	0.35	42	0
Distinct targets	6	0.35	42	0
Distinct targets	6	0.35	42	0
Distinct targets	6	0.35	42	0
Distinct targets	6	0.35	42	0
Distinct targets	6	0.35	42	0
Distinct targets	6	0.35	42	0
Distinct targets	6	0.35	42	0
Distinct targets	6	0.35	42	0
Distinct targets	6	0.35	42	0
Distinct targets	6	0.35	42	0
Distinct targets	6	0.35	42	0
Distinct targets	6	0.35	42	0
Distinct targets	6	0.35	42	0
Distinct targets	6	0.35	42	0
Distinct targets	6	0.35	42	0
Distinct targets	6	0.35	42	0
Distinct targets	6	0.35	42	0
Distinct targets	6	0.35	42	0
Distinct targets	6	0.35	42	0
Distinct targets	6	0.35	42	0
Distinct targets	6	0.35	42	0
Distinct targets	6	0.35	42	0
Distinct targets	6	0.35	42	0
Distinct targets	6	0.35	42	0
Distinct targets	6	0.35	42	0
Distinct targets	6	0.35	42	0
Distinct targets	6	0.35	42	0
Distinct targets	6	0.35	42	0
Distinct targets	6	0.35	42	0
Distinct targets	6	0.35	42	0
Distinct targets	6	0.35	42	0
Distinct targets	6	0.35	42	0
Distinct targets	6	0.35	42	0
Distinct targets	6	0.35	42	0
Distinct targets	6	0.35	42	0
Distinct targets	6	0.35	42	0
Distinct targets	6	0.35	42	0
Distinct targets	6	0.35	42	0
Distinct targets	6	0.35	42	0
Distinct targets	6	0.35	42	0
Distinct targets	6	0.35	42	0
Distinct targets	6	0.35	42	0
Distinct targets	6	0.35	42	0
Distinct targets	6	0.35	42	0
Distinct targets	6	0.35	42	0
Distinct targets	6	0.35	42	0
Distinct targets	6	0.35	42	0
Distinct targets	6	0.35	42	0
Distinct targets	6	0.35	42	0
Distinct targets	6	0.35	42	0
Distinct targets	6	0.35	42	0
Distinct targets	6	0.35	42	0
Distinct targets	6	0.35	42	0
Distinct targets	6	0.35	42	0
Distinct targets	6	0.35	42	0
Distinct targets	6	0.35	42	0
Distinct targets	6	0.35	42	0
Distinct targets	6	0.35	42	0
Distinct targets	6	0.35	42	0
Distinct targets	6	0.35	42	0
Distinct targets	6	0.35	42	0
Distinct targets	6	0.35	42	0
Distinct targets	6	0.35	42	0
Distinct targets	6	0.35	42	0
Distinct targets	6	0.35	42	0
Distinct targets	6	0.35	42	0
Distinct targets	6	0.35	42	0
Distinct targets	6	0.35	42	0
Distinct targets	6	0.35	42	0
Distinct targets	6	0.35	42	1
Distinct targets	6	0.35	42	1
Distinct targets	6	0.35	42	0
Distinct targets	6	0.35	42	0
Distinct targets	6	0.35	42	0
Distinct targets	6	0.35	42	0
Distinct targets	6	0.35	42	0
Distinct targets	6	0.35	42	0
Distinct targets	6	0.35	42	0
Distinct targets	6	0.35	42	0
Distinct targets	6	0.35	42	0
Distinct targets	6	0.35	42	0
Distinct targets	6	0.35	42	0
Distinct targets	6	0.35	42	0
Distinct targets	6	0.35	42	0
Distinct targets	6	0.35	42	0
Distinct targets	6	0.35	42	0
Distinct targets	6	0.35	42	0
Distinct targets	6	0.35	42	0
Distinct targets	6	0.35	42	0
Distinct targets	6	0.35	42	0
Distinct targets	6	0.35	42	0
Distinct targets	6	0.35	42	0
Distinct targets	6	0.35	42	0
Distinct targets	6	0.35	42	0
Distinct targets	6	0.35	42	0
Distinct targets	6	0.35	42	0
Distinct targets	6	0.35	42	0
Distinct targets	6	0.35	42	0
Distinct targets	6	0.35	42	0
Distinct targets	6	0.35	42	0
Distinct targets	6	0.35	42	0
Distinct targets	6	0.35	42	0
Distinct targets	6	0.35	42	0
Distinct targets	6	0.35	42	0
Distinct targets	6	0.35	42	0
Distinct targets	6	0.35	42	0
Distinct targets	6	0.35	42	0
Distinct targets	6	0.35	42	0
Distinct targets	6	0.35	42	0
Distinct targets	6	0.35	42	0
Distinct targets	6	0.35	42	0
Distinct targets	6	0.35	42	0
Distinct targets	6	0.35	42	0
Distinct targets	6	0.35	42	0
Distinct targets	6	0.35	42	0
Distinct targets	6	0.35	42	0
Distinct targets	6	0.35	42	0
Distinct targets	6	0.35	42	0
Distinct targets	6	0.35	42	0
Distinct targets	6	0.35	42	0
Distinct targets	6	0.35	42	0
Distinct targets	6	0.35	42	0
Distinct targets	6	0.35	42	0
Distinct targets	6	0.35	42	0
Distinct targets	6	0.35	42	0
Distinct targets	6	0.35	42	0
Distinct targets	6	0.35	42	0
Distinct targets	6	0.35	42	0
Distinct targets	6	0.35	42	0
Distinct targets	6	0.35	42	0
Distinct targets	6	0.35	42	0
Distinct targets	6	0.35	42	0
Distinct targets	6	0.35	42	0
Distinct targets	6	0.35	42	0
Distinct targets	6	0.35	42	0
Distinct targets	6	0.35	42	0
Distinct targets	6	0.35	42	0
Distinct targets	6	0.35	42	0
Distinct targets	6	0.35	42	0
Distinct targets	6	0.35	42	1
Distinct targets	6	0.35	42	1
Distinct targets	6	0.35	42	0
Distinct targets	6	0.35	42	0
Distinct targets	6	0.35	42	0
Distinct targets	6	0.35	42	0
Distinct targets	6	0.35	42	0
Distinct targets	6	0.35	42	0
Distinct targets	6	0.35	42	0
Distinct targets	6	0.35	42	0
Distinct targets	6	0.35	42	0
Distinct targets	6	0.35	42	0
Distinct targets	6	0.35	42	0
Distinct targets	6	0.35	42	1
Distinct targets	6	0.35	42	1
Distinct targets	6	0.35	42	0
Distinct targets	6	0.35	42	0
Distinct targets	6	0.35	42	0
Distinct targets	6	0.35	42	0
Distinct targets	6	0.35	42	0
Distinct targets	6	0.35	42	0
Distinct targets	6	0.35	42	0
Distinct targets	6	0.35	42	0
Distinct targets	6	0.35	42	0
Distinct targets	6	0.35	42	0
Distinct targets	6	0.35	42	0
Distinct targets	6	0.35	42	0
Distinct targets	6	0.35	42	0
Distinct targets	6	0.35	42	0
Distinct targets	6	0.35	42	1
Distinct targets	6	0.35	42	1
Distinct targets	6	0.35	42	0
Distinct targets	6	0.35	42	0
Distinct targets	6	0.35	42	0
Distinct targets	6	0.35	42	0
Distinct targets	6	0.35	42	0
Distinct targets	6	0.35	42	0
Distinct targets	6	0.35	42	0
Distinct targets	6	0.35	42	0
Distinct targets	6	0.35	42	0
Distinct targets	6	0.35	42	0
Distinct targets	6	0.35	42	0
Distinct targets	6	0.35	42	0
Distinct targets	6	0.35	42	0
Distinct targets	6	0.35	42	0
Distinct targets	6	0.35	42	0
Distinct targets	6	0.35	42	0
Distinct targets	6	0.35	42	0
Distinct targets	6	0.35	42	0
Distinct targets	6	0.35	42	0
Distinct targets	6	0.35	42	0
Distinct targets	6	0.35	42	0
Distinct targets	6	0.35	42	0
Distinct targets	6	0.35	42	0
Distinct targets	6	0.35	42	0
Distinct targets	6	0.35	42	0
Distinct targets	6	0.35	42	0
Distinct targets	6	0.35	42	0
Distinct targets	6	0.35	42	0
Distinct targets	6	0.35	42	0
Distinct targets	6	0.35	42	0
Distinct targets	6	0.35	42	0
Distinct targets	6	0.35	42	0
Distinct targets	6	0.35	42	0
Distinct targets	6	0.35	42	0
Distinct targets	6	0.35	42	0
Distinct targets	6	0.35	42	0
Distinct targets	6	0.35	42	0
Distinct targets	6	0.35	42	0
Distinct targets	6	0.35	42	0
Distinct targets	6	0.35	42	0
Distinct targets	6	0.35	42	0
Distinct targets	6	0.35	42	0
Distinct targets	6	0.35	42	0
Distinct targets	6	0.35	42	0
Distinct targets	6	0.35	42	0
Distinct targets	6	0.35	42	0
Distinct targets	6	0.35	42	0
Distinct targets	6	0.35	42	0
Distinct targets	6	0.35	42	0
Distinct targets	6	0.35	42	0
Distinct targets	6	0.35	42	0
Distinct targets	6	0.35	42	0
Distinct targets	6	0.35	42	0
Distinct targets	6	0.35	42	0
Distinct targets	6	0.35	42	0
Distinct targets	6	0.35	42	0
Distinct targets	6	0.35	42	0
Distinct targets	6	0.35	42	0
Distinct targets	6	0.35	42	0
Distinct targets	6	0.35	42	1
Distinct targets	6	0.35	42	1
Distinct targets	6	0.35	42	0
Distinct targets	6	0.35	42	0
Distinct targets	6	0.35	42	0
Distinct targets	6	0.35	42	0
Distinct targets	6	0.35	42	0
Distinct targets	6	0.35	42	0
Distinct targets	6	0.35	42	0
Distinct targets	6	0.35	42	0
Distinct targets	6	0.35	42	0
Distinct targets	6	0.35	42	0
Distinct targets	6	0.35	42	0
Distinct targets	6	0.35	42	0
Distinct targets	6	0.35	42	0
Distinct targets	6	0.35	42	0
Distinct targets	6	0.35	42	0
Distinct targets	6	0.35	42	0
Distinct targets	6	0.35	42	0
Distinct targets	6	0.35	42	0
Distinct targets	6	0.35	42	0
Distinct targets	6	0.35	42	0
Distinct targets	6	0.35	42	0
Distinct targets	6	0.35	42	0
Distinct targets	6	0.35	42	0
Distinct targets	6	0.35	42	0
Distinct targets	6	0.35	42	0
Distinct targets	6	0.35	42	0
Distinct targets	6	0.35	42	0
Distinct targets	6	0.35	42	0
Distinct targets	6	0.35	42	0
Distinct targets	6	0.35	42	0
Distinct targets	6	0.35	42	0
Distinct targets	6	0.35	42	0
Distinct targets	6	0.35	42	0
Distinct targets	6	0.35	42	0
Distinct targets	6	0.35	42	0
Distinct targets	6	0.35	42	0
Distinct targets	6	0.35	42	0
Distinct targets	6	0.35	42	0
Distinct targets	6	0.35	42	0
Distinct targets	6	0.35	42	0
Distinct targets	6	0.35	42	0
Distinct targets	6	0.35	42	0
Distinct targets	6	0.35	42	0
Distinct targets	6	0.35	42	0
Distinct targets	6	0.35	42	0
Distinct targets	6	0.35	42	0
Distinct targets	6	0.35	42	0
Distinct targets	6	0.35	42	0
Distinct targets	6	0.35	42	0
Distinct targets	6	0.35	42	0
Distinct targets	6	0.35	42	0
Distinct targets	6	0.35	42	0
Distinct targets	6	0.35	42	0
Distinct targets	6	0.35	42	0
Distinct targets	6	0.35	42	0
Distinct targets	6	0.35	42	0
Distinct targets	6	0.35	42	0
Distinct targets	6	0.35	42	0
Distinct targets	6	0.35	42	0
Distinct targets	6	0.35	42	0
Distinct targets	6	0.35	42	0
Distinct targets	6	0.35	42	0
Distinct targets	6	0.35	42	0
Distinct targets	6	0.35	42	0
Distinct targets	6	0.35	42	0
Distinct targets	6	0.35	42	0
Distinct targets	6	0.35	42	0
Distinct targets	6	0.35	42	0
Distinct targets	6	0.35	42	0
Distinct targets	6	0.35	42	0
Distinct targets	6	0.35	42	0
Distinct targets	6	0.35	42	0
Distinct targets	6	0.35	42	0
Distinct targets	6	0.35	42	0
Distinct targets	6	0.35	42	0
Distinct targets	6	0.35	42	0
Distinct targets	6	0.35	42	0
Distinct targets	6	0.35	42	0
Distinct targets	6	0.35	42	0
Distinct targets	6	0.35	42	0
Distinct targets	6	0.35	42	0
Distinct targets	6	0.35	42	0
Distinct targets	6	0.35	42	0
Distinct targets	6	0.35	42	0
Distinct targets	6	0.35	42	0
Distinct targets	6	0.35	42	0
Distinct targets	6	0.35	42	0
Distinct targets	6	0.35	42	0
Distinct targets	6	0.35	42	0
Distinct targets	6	0.35	42	0
Distinct targets	6	0.35	42	0
Distinct targets	6	0.35	42	0
Distinct targets	6	0.35	42	0
Distinct targets	6	0.35	42	0
Distinct targets	6	0.35	42	0
Distinct targets	6	0.35	42	0
Distinct targets	6	0.35	42	0
Distinct targets	6	0.35	42	0
Distinct targets	6	0.35	42	0
Distinct targets	6	0.35	42	0
Distinct targets	6	0.35	42	0
Distinct targets	6	0.35	42	0
Distinct targets	6	0.35	42	0
Distinct targets	6	0.35	42	0
Distinct targets	6	0.35	42	0
Distinct targets	6	0.35	42	0
Distinct targets	6	0.35	42	0
Distinct targets	6	0.35	42	0
Distinct targets	6	0.35	42	0
Distinct targets	6	0.35	42	0
Distinct targets	6	0.35	42	0
Distinct targets	6	0.35	42	0
Distinct targets	6	0.35	42	0
Distinct targets	6	0.35	42	0
Distinct targets	6	0.35	42	0
Distinct targets	6	0.35	42	0
Distinct targets	6	0.35	42	0
Distinct targets	6	0.35	42	0
Distinct targets	6	0.35	42	0
Distinct targets	6	0.35	42	0
Distinct targets	6	0.35	42	0
Distinct targets	6	0.35	42	0
Distinct targets	6	0.35	42	0
Distinct targets	6	0.35	42	0
Distinct targets	6	0.35	42	0
Distinct targets	6	0.35	42	0
Distinct targets	6	0.35	42	0
Distinct targets	6	0.35	42	0
Distinct targets	6	0.35	42	0
Distinct targets	6	0.35	42	0
Distinct targets	6	0.35	42	0
Distinct targets	6	0.35	42	0
Distinct targets	6	0.35	42	0
Distinct targets	6	0.35	42	0
Distinct targets	6	0.35	42	0
Distinct targets	6	0.35	42	0
Distinct targets	6	0.35	42	0
Distinct targets	6	0.35	42	0
Distinct targets	6	0.35	42	0
Distinct targets	6	0.35	42	0
Distinct targets	6	0.35	42	0
Distinct targets	6	0.35	42	0
Distinct targets	6	0.35	42	0
Distinct targets	6	0.35	42	0
Distinct targets	6	0.35	42	0
Distinct targets	6	0.35	42	0
Distinct targets	6	0.35	42	0
Distinct targets	6	0.35	42	0
Distinct targets	6	0.35	42	0
Distinct targets	6	0.35	42	0
Distinct targets	6	0.35	42	0
Distinct targets	6	0.35	42	0
Distinct targets	6	0.35	42	0
Distinct targets	6	0.35	42	0
Distinct targets	6	0.35	42	0
Distinct targets	6	0.35	42	0
Distinct targets	6	0.35	42	0
Distinct targets	6	0.35	42	0
Distinct targets	6	0.35	42	0
Distinct targets	6	0.35	42	0
Distinct targets	6	0.35	42	0
Distinct targets	6	0.35	42	0
Distinct targets	6	0.35	42	0
Distinct targets	6	0.35	42	0
Distinct targets	6	0.35	42	0
Distinct targets	6	0.35	42	0
Distinct targets	6	0.35	42	0
Distinct targets	6	0.35	42	0
Distinct targets	6	0.35	42	0
Distinct targets	6	0.35	42	0
Distinct targets	6	0.35	42	0
Distinct targets	6	0.35	42	0
Distinct targets	6	0.35	42	0
Distinct targets	6	0.35	42	0
Distinct targets	6	0.35	42	0
Distinct targets	6	0.35	42	0
Distinct targets	6	0.35	42	0
Distinct targets	6	0.35	42	0
Distinct targets	6	0.35	42	0
Distinct targets	6	0.35	42	0
Distinct targets	6	0.35	42	0
Distinct targets	6	0.35	42	0
Distinct targets	6	0.35	42	0
Distinct targets	6	0.35	42	0
Distinct targets	6	0.35	42	0
Distinct targets	6	0.35	42	0
Distinct targets	6	0.35	42	0
Distinct targets	6	0.35	42	0
Distinct targets	6	0.35	42	0
Distinct targets	6	0.35	42	0
Distinct targets	6	0.35	42	0
Distinct targets	6	0.35	42	0
Distinct targets	6	0.35	42	0
Distinct targets	6	0.35	42	0
Distinct targets	6	0.35	42	0
Distinct targets	6	0.35	42	0
Distinct targets	6	0.35	42	0
Distinct targets	6	0.35	42	0
Distinct targets	6	0.35	42	0
Distinct targets	6	0.35	42	0
Distinct targets	6	0.35	42	0
Distinct targets	6	0.35	42	0
Distinct targets	6	0.35	42	0
Distinct targets	6	0.35	42	0
Distinct targets	6	0.35	42	0
Distinct targets	6	0.35	42	0
Distinct targets	6	0.35	42	0
Distinct targets	6	0.35	42	0
Distinct targets	6	0.35	42	0
Distinct targets	6	0.35	42	0
Distinct targets	6	0.35	42	0
Distinct targets	6	0.35	42	0
Distinct targets	6	0.35	42	0
Distinct targets	6	0.35	42	0
Distinct targets	6	0.35	42	0
Distinct targets	6	0.35	42	0
Distinct targets	6	0.35	42	0
Distinct targets	6	0.35	42	0
Distinct targets	6	0.35	42	0
Distinct targets	6	0.35	42	0
Distinct targets	6	0.35	42	0
Distinct targets	6	0.35	42	0
Distinct targets	6	0.35	42	0
Distinct targets	6	0.35	42	0
Distinct targets	6	0.35	42	0
Distinct targets	6	0.35	42	0
Distinct targets	6	0.35	42	0
Distinct targets	6	0.35	42	0
Distinct targets	6	0.35	42	0
Distinct targets	6	0.35	42	0
Distinct targets	6	0.35	42	0
Distinct targets	6	0.35	42	0
Distinct targets	6	0.35	42	0
Distinct targets	6	0.35	42	0
Distinct targets	6	0.35	42	0
Distinct targets	6	0.35	42	0
Distinct targets	6	0.35	42	0
Distinct targets	6	0.35	42	0
Distinct targets	6	0.35	42	0
Distinct targets	6	0.35	42	0
Distinct targets	6	0.35	42	0
Distinct targets	6	0.35	42	0
Distinct targets	6	0.35	42	0
Distinct targets	6	0.35	42	0
Distinct targets	6	0.35	42	0
Distinct targets	6	0.35	42	0
Distinct targets	6	0.35	42	0
Distinct targets	6	0.35	42	0
Distinct targets	6	0.35	42	0
Distinct targets	6	0.35	42	0
Distinct targets	6	0.35	42	0
Distinct targets	6	0.35	42	0
Distinct targets	6	0.35	42	0
Distinct targets	6	0.35	42	0
Distinct targets	6	0.35	42	0
Distinct targets	6	0.35	42	0
Distinct targets	6	0.35	42	0
Distinct targets	6	0.35	42	0
Distinct targets	6	0.35	42	0
Distinct targets	6	0.35	42	0
Distinct targets	6	0.35	42	0
Distinct targets	6	0.35	42	0
Distinct targets	6	0.35	42	0
Distinct targets	6	0.35	42	0
Distinct targets	6	0.35	42	0
Distinct targets	6	0.35	42	0
Distinct targets	6	0.35	42	0
Distinct targets	6	0.35	42	0
Distinct targets	6	0.35	42	0
Distinct targets	6	0.35	42	0
Distinct targets	6	0.35	42	0
Distinct targets	6	0.35	42	0
Distinct targets	6	0.35	42	0
Distinct targets	6	0.35	42	0
Distinct targets	6	0.35	42	0
Distinct targets	6	0.35	42	0
Distinct targets	6	0.35	42	0
Distinct targets	6	0.35	42	0
Distinct targets	6	0.35	42	0
Distinct targets	6	0.35	42	0
Distinct targets	6	0.35	42	0
Distinct targets	6	0.35	42	0
Distinct targets	6	0.35	42	0
Distinct targets	6	0.35	42	0
Distinct targets	6	0.35	42	0
Distinct targets	6	0.35	42	0
Distinct targets	6	0.35	42	0
Distinct targets	6	0.35	42	0
Distinct targets	6	0.35	42	0
Distinct targets	6	0.35	42	0
Distinct targets	6	0.35	42	0
Distinct targets	6	0.35	42	0
Distinct targets	6	0.35	42	0
Distinct targets	6	0.35	42	0
Distinct targets	6	0.35	42	0
Distinct targets	6	0.35	42	0
Distinct targets	6	0.35	42	0
Distinct targets	6	0.35	42	0
Distinct targets	6	0.35	42	0
Distinct targets	6	0.35	42	0
Distinct targets	6	0.35	42	0
Distinct targets	6	0.35	42	0
Distinct targets	6	0.35	42	0
Distinct targets	6	0.35	42	0
Distinct targets	6	0.35	42	0
Distinct targets	6	0.35	42	0
Distinct targets	6	0.35	42	0
Distinct targets	6	0.35	42	0
Distinct targets	6	0.35	42	0
Distinct targets	6	0.35	42	0
Distinct targets	6	0.35	42	0
Distinct targets	6	0.35	42	0
Distinct targets	6	0.35	42	0
Distinct targets	6	0.35	42	0
Distinct targets	6	0.35	42	0
Distinct targets	6	0.35	42	0
Distinct targets	6	0.35	42	0
Distinct targets	6	0.35	42	0
Distinct targets	6	0.35	42	0
Distinct targets	6	0.35	42	0
Distinct targets	6	0.35	42	0
Distinct targets	6	0.35	42	0
Distinct targets	6	0.35	42	0
Distinct targets	6	0.35	42	0
Distinct targets	6	0.35	42	0
Distinct targets	6	0.35	42	0
Distinct targets	6	0.35	42	0
Distinct targets	6	0.35	42	0
Distinct targets	6	0.35	42	0
Distinct targets	6	0.35	42	0
Distinct targets	6	0.35	42	0
Distinct targets	6	0.35	42	0
Distinct targets	6	0.35	42	0
Distinct targets	6	0.35	42	0
Distinct targets	6	0.35	42	1
Distinct targets	6	0.35	42	1
Distinct targets	6	0.35	42	0
Distinct targets	6	0.35	42	0
Distinct targets	6	0.35	42	0
Distinct targets	6	0.35	42	0
Distinct targets	6	0.35	42	0
Distinct targets	6	0.35	42	0
Distinct targets	6	0.35	42	0
Distinct targets	6	0.35	42	0
Distinct targets	6	0.35	42	0
Distinct targets	6	0.35	42	0
Distinct targets	6	0.35	42	0
Distinct targets	6	0.35	42	0
Distinct targets	6	0.35	42	0
Distinct targets	6	0.35	42	0
Distinct targets	6	0.35	42	0
Distinct targets	6	0.35	42	0
Distinct targets	6	0.35	42	0
Distinct targets	6	0.35	42	0
Distinct targets	6	0.35	42	0
Distinct targets	6	0.35	42	0
Distinct targets	6	0.35	42	0
Distinct targets	6	0.35	42	0
Distinct targets	6	0.35	42	0
Distinct targets	6	0.35	42	0
Distinct targets	6	0.35	42	0
Distinct targets	6	0.35	42	0
Distinct targets	6	0.35	42	0
Distinct targets	6	0.35	42	0
Distinct targets	6	0.35	42	0
Distinct targets	6	0.35	42	0
Distinct targets	6	0.35	42	0
Distinct targets	6	0.35	42	0
Distinct targets	6	0.35	42	0
Distinct targets	6	0.35	42	0
Distinct targets	6	0.35	42	0
Distinct targets	6	0.35	42	0
Distinct targets	6	0.35	42	0
Distinct targets	6	0.35	42	0
Distinct targets	6	0.35	42	0
Distinct targets	6	0.35	42	0
Distinct targets	6	0.35	42	1
Distinct targets	6	0.35	42	1
Distinct targets	6	0.35	42	0
Distinct targets	6	0.35	42	0
Distinct targets	6	0.35	42	0
Distinct targets	6	0.35	42	0
Distinct targets	6	0.35	42	0
Distinct targets	6	0.35	42	0
Distinct targets	6	0.35	42	0
Distinct targets	6	0.35	42	0
Distinct targets	6	0.35	42	0
Distinct targets	6	0.35	42	0
Distinct targets	6	0.35	42	0
Distinct targets	6	0.35	42	0
Distinct targets	6	0.35	42	0
Distinct targets	6	0.35	42	0
Distinct targets	6	0.35	42	0
Distinct targets	6	0.35	42	0
Distinct targets	6	0.35	42	0
Distinct targets	6	0.35	42	0
Distinct targets	6	0.35	42	0
Distinct targets	6	0.35	42	0
Distinct targets	6	0.35	42	0
Distinct targets	6	0.35	42	0
Distinct targets	6	0.35	42	0
Distinct targets	6	0.35	42	0
Distinct targets	6	0.35	42	0
Distinct targets	6	0.35	42	0
Distinct targets	6	0.35	42	0
Distinct targets	6	0.35	42	0
Distinct targets	6	0.35	42	0
Distinct targets	6	0.35	42	0
Distinct targets	6	0.35	42	0
Distinct targets	6	0.35	42	0
Distinct targets	6	0.35	42	0
Distinct targets	6	0.35	42	0
Distinct targets	6	0.35	42	0
Distinct targets	6	0.35	42	0
Distinct targets	6	0.35	42	0
Distinct targets	6	0.35	42	0
Distinct targets	6	0.35	42	0
Distinct targets	6	0.35	42	0
Distinct targets	6	0.35	42	0
Distinct targets	6	0.35	42	0
Distinct targets	6	0.35	42	0
Distinct targets	6	0.35	42	0
Distinct targets	6	0.35	42	0
Distinct targets	6	0.35	42	0
Distinct targets	6	0.35	42	0
Distinct targets	6	0.35	42	0
Distinct targets	6	0.35	42	0
Distinct targets	6	0.35	42	0
Distinct targets	6	0.35	42	0
Distinct targets	6	0.35	42	0
Distinct targets	6	0.35	42	0
Distinct targets	6	0.35	42	0
Distinct targets	6	0.35	42	0
Distinct targets	6	0.35	42	0
Distinct targets	6	0.35	42	0
Distinct targets	6	0.35	42	0
Distinct targets	6	0.35	42	0
Distinct targets	6	0.35	42	0
Distinct targets	6	0.35	42	0
Distinct targets	6	0.35	42	0
Distinct targets	6	0.35	42	0
Distinct targets	6	0.35	42	0
Distinct targets	6	0.35	42	0
Distinct targets	6	0.35	42	0
Distinct targets	6	0.35	42	0
Distinct targets	6	0.35	42	0
Distinct targets	6	0.35	42	0
Distinct targets	6	0.35	42	0
Distinct targets	6	0.35	42	0
Distinct targets	6	0.35	42	0
Distinct targets	6	0.35	42	0
Distinct targets	6	0.35	42	0
Distinct targets	6	0.35	42	0
Distinct targets	6	0.35	42	0
Distinct targets	6	0.35	42	0
Distinct targets	6	0.35	42	0
Distinct targets	6	0.35	42	0
Distinct targets	6	0.35	42	0
Distinct targets	6	0.35	42	0
Distinct targets	6	0.35	42	0
Distinct targets	6	0.35	42	0
Distinct targets	6	0.35	42	0
Distinct targets	6	0.35	42	0
Distinct targets	6	0.35	42	0
Distinct targets	6	0.35	42	0
Distinct targets	6	0.35	42	0
Distinct targets	6	0.35	42	0
Distinct targets	6	0.35	42	0
Distinct targets	6	0.35	42	0
Distinct targets	6	0.35	42	0
Distinct targets	6	0.35	42	0
Distinct targets	6	0.35	42	0
Distinct targets	6	0.35	42	0
Distinct targets	6	0.35	42	0
Distinct targets	6	0.35	42	0
Distinct targets	6	0.35	42	0
Distinct targets	6	0.35	42	0
Distinct targets	6	0.35	42	0
Distinct targets	6	0.35	42	0
Distinct targets	6	0.35	42	0
Distinct targets	6	0.35	42	0
Distinct targets	6	0.35	42	0
Distinct targets	6	0.35	42	0
Distinct targets	6	0.35	42	0
Distinct targets	6	0.35	42	0
Distinct targets	6	0.35	42	0
Distinct targets	6	0.35	42	0
Distinct targets	6	0.35	42	0
Distinct targets	6	0.35	42	0
Distinct targets	6	0.35	42	0
Distinct targets	6	0.35	42	0
Distinct targets	6	0.35	42	0
Distinct targets	6	0.35	42	0
Distinct targets	6	0.35	42	0
Distinct targets	6	0.35	42	0
Distinct targets	6	0.35	42	0
Distinct targets	6	0.35	42	0
Distinct targets	6	0.35	42	0
Distinct targets	6	0.35	42	0
Distinct targets	6	0.35	42	0
Distinct targets	6	0.35	42	0
Distinct targets	6	0.35	42	0
Distinct targets	6	0.35	42	0
Distinct targets	6	0.35	42	0
Distinct targets	6	0.35	42	0
Distinct targets	6	0.35	42	0
Distinct targets	6	0.35	42	0
Distinct targets	6	0.35	42	0
Distinct targets	6	0.35	42	0
Distinct targets	6	0.35	42	0
Distinct targets	6	0.35	42	0
Distinct targets	6	0.35	42	0
Distinct targets	6	0.35	42	0
Distinct targets	6	0.35	42	1
Distinct targets	6	0.35	42	1
Distinct targets	6	0.35	42	0
Distinct targets	6	0.35	42	0
Distinct targets	6	0.35	42	0
Distinct targets	6	0.35	42	0
Distinct targets	6	0.35	42	0
Distinct targets	6	0.35	42	0
Distinct targets	6	0.35	42	0
Distinct targets	6	0.35	42	0
Distinct targets	6	0.35	42	0
Distinct targets	6	0.35	42	0
Distinct targets	6	0.35	42	0
Distinct targets	6	0.35	42	0
Distinct targets	6	0.35	42	0
Distinct targets	6	0.35	42	0
Distinct targets	6	0.35	42	0
Distinct targets	6	0.35	42	0
Distinct targets	6	0.35	42	0
Distinct targets	6	0.35	42	0
Distinct targets	6	0.35	42	0
Distinct targets	6	0.35	42	0
Distinct targets	6	0.35	42	0
Distinct targets	6	0.35	42	0
Distinct targets	6	0.35	42	0
Distinct targets	6	0.35	42	0
Distinct targets	6	0.35	42	0
Distinct targets	6	0.35	42	0
Distinct targets	6	0.35	42	0
Distinct targets	6	0.35	42	0
Distinct targets	6	0.35	42	0
Distinct targets	6	0.35	42	0
Distinct targets	6	0.35	42	0
Distinct targets	6	0.35	42	0
Distinct targets	6	0.35	42	0
Distinct targets	6	0.35	42	0
Distinct targets	6	0.35	42	0
Distinct targets	6	0.35	42	0
Distinct targets	6	0.35	42	0
Distinct targets	6	0.35	42	0
Distinct targets	6	0.35	42	0
Distinct targets	6	0.35	42	0
Distinct targets	6	0.35	42	0
Distinct targets	6	0.35	42	0
Distinct targets	6	0.35	42	0
Distinct targets	6	0.35	42	0
Distinct targets	6	0.35	42	0
Distinct targets	6	0.35	42	0
Distinct targets	6	0.35	42	0
Distinct targets	6	0.35	42	0
Distinct targets	6	0.35	42	1
Distinct targets	6	0.35	42	1
Distinct targets	6	0.35	42	0
Distinct targets	6	0.35	42	0
Distinct targets	6	0.35	42	0
Distinct targets	6	0.35	42	0
Distinct targets	6	0.35	42	0
Distinct targets	6	0.35	42	0
Distinct targets	6	0.35	42	0
Distinct targets	6	0.35	42	0
Distinct targets	6	0.35	42	0
Distinct targets	6	0.35	42	0
Distinct targets	6	0.35	42	0
Distinct targets	6	0.35	42	0
Distinct targets	6	0.35	42	0
Distinct targets	6	0.35	42	0
Distinct targets	6	0.35	42	0
Distinct targets	6	0.35	42	0
Distinct targets	6	0.35	42	0
Distinct targets	6	0.35	42	0
Distinct targets	6	0.35	42	0
Distinct targets	6	0.35	42	0
Distinct targets	6	0.35	42	0
Distinct targets	6	0.35	42	0
Distinct targets	6	0.35	42	0
Distinct targets	6	0.35	42	0
Distinct targets	6	0.35	42	0
Distinct targets	6	0.35	42	0
Distinct targets	6	0.35	42	0
Distinct targets	6	0.35	42	0
Distinct targets	6	0.35	42	0
Distinct targets	6	0.35	42	0
Distinct targets	6	0.35	42	0
Distinct targets	6	0.35	42	0
Distinct targets	6	0.35	42	0
Distinct targets	6	0.35	42	0
Distinct targets	6	0.35	42	0
Distinct targets	6	0.35	42	0
Distinct targets	6	0.35	42	0
Distinct targets	6	0.35	42	0
Distinct targets	6	0.35	42	0
Distinct targets	6	0.35	42	0
Distinct targets	6	0.35	42	0
Distinct targets	6	0.35	42	0
Distinct targets	6	0.35	42	0
Distinct targets	6	0.35	42	0
Distinct targets	6	0.35	42	0
Distinct targets	6	0.35	42	0
Distinct targets	6	0.35	42	0
Distinct targets	6	0.35	42	0
Distinct targets	6	0.35	42	0
Distinct targets	6	0.35	42	0
Distinct targets	6	0.35	42	0
Distinct targets	6	0.35	42	0
Distinct targets	6	0.35	42	0
Distinct targets	6	0.35	42	0
Distinct targets	6	0.35	42	0
Distinct targets	6	0.35	42	0
Distinct targets	6	0.35	42	0
Distinct targets	6	0.35	42	0
Distinct targets	6	0.35	42	0
Distinct targets	6	0.35	42	0
Distinct targets	6	0.35	42	0
Distinct targets	6	0.35	42	0
Distinct targets	6	0.35	42	0
Distinct targets	6	0.35	42	0
Distinct targets	6	0.35	42	0
Distinct targets	6	0.35	42	0
Distinct targets	6	0.35	42	0
Distinct targets	6	0.35	42	0
Distinct targets	6	0.35	42	0
Distinct targets	6	0.35	42	0
Distinct targets	6	0.35	42	0
Distinct targets	6	0.35	42	0
Distinct targets	6	0.35	42	0
Distinct targets	6	0.35	42	0
Distinct targets	6	0.35	42	0
Distinct targets	6	0.35	42	0
Distinct targets	6	0.35	42	0
Distinct targets	6	0.35	42	0
Distinct targets	6	0.35	42	0
Distinct targets	6	0.35	42	0
Distinct targets	6	0.35	42	0
Distinct targets	6	0.35	42	0
Distinct targets	6	0.35	42	0
Distinct targets	6	0.35	42	0
Distinct targets	6	0.35	42	0
Distinct targets	6	0.35	42	0
Distinct targets	6	0.35	42	0
Distinct targets	6	0.35	42	0
Distinct targets	6	0.35	42	0
Distinct targets	6	0.35	42	0
Distinct targets	6	0.35	42	0
Distinct targets	6	0.35	42	0
Distinct targets	6	0.35	42	0
Distinct targets	6	0.35	42	0
Distinct targets	6	0.35	42	0
Distinct targets	6	0.35	42	0
Distinct targets	6	0.35	42	0
Distinct targets	6	0.35	42	0
Distinct targets	6	0.35	42	0
Distinct targets	6	0.35	42	0
Distinct targets	6	0.35	42	0
Distinct targets	6	0.35	42	0
Distinct targets	6	0.35	42	0
Distinct targets	6	0.35	42	0
Distinct targets	6	0.35	42	0
Distinct targets	6	0.35	42	0
Distinct targets	6	0.35	42	0
Distinct targets	6	0.35	42	0
Distinct targets	6	0.35	42	0
Distinct targets	6	0.35	42	0
Distinct targets	6	0.35	42	0
Distinct targets	6	0.35	42	0
Distinct targets	6	0.35	42	0
Distinct targets	6	0.35	42	0
Distinct targets	6	0.35	42	0
Distinct targets	6	0.35	42	0
Distinct targets	6	0.35	42	0
Distinct targets	6	0.35	42	0
Distinct targets	6	0.35	42	0
Distinct targets	6	0.35	42	0
Distinct targets	6	0.35	42	0
Distinct targets	6	0.35	42	0
Distinct targets	6	0.35	42	0
Distinct targets	6	0.35	42	0
Distinct targets	6	0.35	42	0
Distinct targets	6	0.35	42	0
Distinct targets	6	0.35	42	0
Distinct targets	6	0.35	42	0
Distinct targets	6	0.35	42	0
Distinct targets	6	0.35	42	0
Distinct targets	6	0.35	42	0
Distinct targets	6	0.35	42	0
Distinct targets	6	0.35	42	0
Distinct targets	6	0.35	42	0
Distinct targets	6	0.35	42	0
Distinct targets	6	0.35	42	0
Distinct targets	6	0.35	42	0
Distinct targets	6	0.35	42	1
Distinct targets	6	0.35	42	1
Distinct targets	6	0.35	42	0
Distinct targets	6	0.35	42	0
Distinct targets	6	0.35	42	0
Distinct targets	6	0.35	42	0
Distinct targets	6	0.35	42	0
Distinct targets	6	0.35	42	0
Distinct targets	6	0.35	42	0
Distinct targets	6	0.35	42	0
Distinct targets	6	0.35	42	0
Distinct targets	6	0.35	42	0
Distinct targets	6	0.35	42	0
Distinct targets	6	0.35	42	0
Distinct targets	6	0.35	42	0
Distinct targets	6	0.35	42	0
Distinct targets	6	0.35	42	0
Distinct targets	6	0.35	42	0
Distinct targets	6	0.35	42	0
Distinct targets	6	0.35	42	0
Distinct targets	6	0.35	42	0
Distinct targets	6	0.35	42	0
Distinct targets	6	0.35	42	0
Distinct targets	6	0.35	42	0
Distinct targets	6	0.35	42	0
Distinct targets	6	0.35	42	0
Distinct targets	6	0.35	42	0
Distinct targets	6	0.35	42	0
Distinct targets	6	0.35	42	0
Distinct targets	6	0.35	42	0
Distinct targets	6	0.35	42	0
Distinct targets	6	0.35	42	0
Distinct targets	6	0.35	42	0
Distinct targets	6	0.35	42	0
Distinct targets	6	0.35	42	0
Distinct targets	6	0.35	42	0
Distinct targets	6	0.35	42	0
Distinct targets	6	0.35	42	0
Distinct targets	6	0.35	42	0
Distinct targets	6	0.35	42	0
Distinct targets	6	0.35	42	0
Distinct targets	6	0.35	42	0
Distinct targets	6	0.35	42	0
Distinct targets	6	0.35	42	0
Distinct targets	6	0.35	42	0
Distinct targets	6	0.35	42	0
Distinct targets	6	0.35	42	0
Distinct targets	6	0.35	42	0
Distinct targets	6	0.35	42	0
Distinct targets	6	0.35	42	0
Distinct targets	6	0.35	42	0
Distinct targets	6	0.35	42	0
Distinct targets	6	0.35	42	0
Distinct targets	6	0.35	42	1
Distinct targets	6	0.35	42	1
Distinct targets	6	0.35	42	0
Distinct targets	6	0.35	42	0
Distinct targets	6	0.35	42	0
Distinct targets	6	0.35	42	0
Distinct targets	6	0.35	42	0
Distinct targets	6	0.35	42	0
Distinct targets	6	0.35	42	0
Distinct targets	6	0.35	42	0
Distinct targets	6	0.35	42	0
Distinct targets	6	0.35	42	0
Distinct targets	6	0.35	42	0
Distinct targets	6	0.35	42	0
Distinct targets	6	0.35	42	0
Distinct targets	6	0.35	42	0
Distinct targets	6	0.35	42	0
Distinct targets	6	0.35	42	0
Distinct targets	6	0.35	42	0
Distinct targets	6	0.35	42	0
Distinct targets	6	0.35	42	0
Distinct targets	6	0.35	42	0
Distinct targets	6	0.35	42	0
Distinct targets	6	0.35	42	0
Distinct targets	6	0.35	42	0
Distinct targets	6	0.35	42	0
Distinct targets	6	0.35	42	0
Distinct targets	6	0.35	42	0
Distinct targets	6	0.35	42	0
Distinct targets	6	0.35	42	0
Distinct targets	6	0.35	42	0
Distinct targets	6	0.35	42	0
Distinct targets	6	0.35	42	0
Distinct targets	6	0.35	42	0
Distinct targets	6	0.35	42	0
Distinct targets	6	0.35	42	0
Distinct targets	6	0.35	42	0
Distinct targets	6	0.35	42	0
Distinct targets	6	0.35	42	0
Distinct targets	6	0.35	42	0
Distinct targets	6	0.35	42	1
Distinct targets	6	0.35	42	1
Distinct targets	6	0.35	42	0
Distinct targets	6	0.35	42	0
Distinct targets	6	0.35	42	0
Distinct targets	6	0.35	42	0
Distinct targets	6	0.35	42	0
Distinct targets	6	0.35	42	0
Distinct targets	6	0.35	42	0
Distinct targets	6	0.35	42	0
Distinct targets	6	0.35	42	0
Distinct targets	6	0.35	42	0
Distinct targets	6	0.35	42	0
Distinct targets	6	0.35	42	0
Distinct targets	6	0.35	42	0
Distinct targets	6	0.35	42	0
Distinct targets	6	0.35	42	1
Distinct targets	6	0.35	42	1
Distinct targets	6	0.35	42	0
Distinct targets	6	0.35	42	0
Distinct targets	6	0.35	42	0
Distinct targets	6	0.35	42	0
Distinct targets	6	0.35	42	0
Distinct targets	6	0.35	42	0
Distinct targets	6	0.35	42	0
Distinct targets	6	0.35	42	0
Distinct targets	6	0.35	42	0
Distinct targets	6	0.35	42	0
Distinct targets	6	0.35	42	0
Distinct targets	6	0.35	42	0
Distinct targets	6	0.35	42	0
Distinct targets	6	0.35	42	0
Distinct targets	6	0.35	42	0
Distinct targets	6	0.35	42	0
Distinct targets	6	0.35	42	0
Distinct targets	6	0.35	42	0
Distinct targets	6	0.35	42	0
Distinct targets	6	0.35	42	0
Distinct targets	6	0.35	42	0
Distinct targets	6	0.35	42	0
Distinct targets	6	0.35	42	0
Distinct targets	6	0.35	42	0
Distinct targets	6	0.35	42	0
Distinct targets	6	0.35	42	0
Distinct targets	6	0.35	42	0
Distinct targets	6	0.35	42	0
Distinct targets	6	0.35	42	0
Distinct targets	6	0.35	42	0
Distinct targets	6	0.35	42	0
Distinct targets	6	0.35	42	0
Distinct targets	6	0.35	42	0
Distinct targets	6	0.35	42	0
Distinct targets	6	0.35	42	0
Distinct targets	6	0.35	42	0
Distinct targets	6	0.35	42	0
Distinct targets	6	0.35	42	0
Distinct targets	6	0.35	42	0
Distinct targets	6	0.35	42	0
Distinct targets	6	0.35	42	0
Distinct targets	6	0.35	42	0
Distinct targets	6	0.35	42	0
Distinct targets	6	0.35	42	0
Distinct targets	6	0.35	42	0
Distinct targets	6	0.35	42	0
Distinct targets	6	0.35	42	0
Distinct targets	6	0.35	42	0
Distinct targets	6	0.35	42	0
Distinct targets	6	0.35	42	0
Distinct targets	6	0.35	42	0
Distinct targets	6	0.35	42	0
Distinct targets	6	0.35	42	0
Distinct targets	6	0.35	42	0
Distinct targets	6	0.35	42	0
Distinct targets	6	0.35	42	0
Distinct targets	6	0.35	42	0
Distinct targets	6	0.35	42	0
Distinct targets	6	0.35	42	0
Distinct targets	6	0.35	42	0
Distinct targets	6	0.35	42	0
Distinct targets	6	0.35	42	0
Distinct targets	6	0.35	42	0
Distinct targets	6	0.35	42	0
Distinct targets	6	0.35	42	0
Distinct targets	6	0.35	42	0
Distinct targets	6	0.35	42	0
Distinct targets	6	0.35	42	1
Distinct targets	6	0.35	42	1
Distinct targets	6	0.35	42	0
Distinct targets	6	0.35	42	0
Distinct targets	6	0.35	42	0
Distinct targets	6	0.35	42	0
Distinct targets	6	0.35	42	0
Distinct targets	6	0.35	42	0
Distinct targets	6	0.35	42	0
Distinct targets	6	0.35	42	0
Distinct targets	6	0.35	42	0
Distinct targets	6	0.35	42	0
Distinct targets	6	0.35	42	0
Distinct targets	6	0.35	42	0
Distinct targets	6	0.35	42	0
Distinct targets	6	0.35	42	0
Distinct targets	6	0.35	42	0
Distinct targets	6	0.35	42	0
Distinct targets	6	0.35	42	0
Distinct targets	6	0.35	42	0
Distinct targets	6	0.35	42	0
Distinct targets	6	0.35	42	0
Distinct targets	6	0.35	42	0
Distinct targets	6	0.35	42	0
Distinct targets	6	0.35	42	0
Distinct targets	6	0.35	42	0
Distinct targets	6	0.35	42	0
Distinct targets	6	0.35	42	0
Distinct targets	6	0.35	42	0
Distinct targets	6	0.35	42	0
Distinct targets	6	0.35	42	0
Distinct targets	6	0.35	42	0
Distinct targets	6	0.35	42	0
Distinct targets	6	0.35	42	0
Distinct targets	6	0.35	42	0
Distinct targets	6	0.35	42	0
Distinct targets	6	0.35	42	0
Distinct targets	6	0.35	42	0
Distinct targets	6	0.35	42	0
Distinct targets	6	0.35	42	0
Distinct targets	6	0.35	42	0
Distinct targets	6	0.35	42	0
Distinct targets	6	0.35	42	0
Distinct targets	6	0.35	42	0
Distinct targets	6	0.35	42	0
Distinct targets	6	0.35	42	0
Distinct targets	6	0.35	42	0
Distinct targets	6	0.35	42	0
Distinct targets	6	0.35	42	0
Distinct targets	6	0.35	42	0
Distinct targets	6	0.35	42	0
Distinct targets	6	0.35	42	0
Distinct targets	6	0.35	42	0
Distinct targets	6	0.35	42	0
Distinct targets	6	0.35	42	0
Distinct targets	6	0.35	42	0
Distinct targets	6	0.35	42	0
Distinct targets	6	0.35	42	1
Distinct targets	6	0.35	42	1
Distinct targets	6	0.35	42	0
Distinct targets	6	0.35	42	0
Distinct targets	6	0.35	42	1
Distinct targets	6	0.35	42	1
Distinct targets	6	0.35	42	0
Distinct targets	6	0.35	42	0
Distinct targets	6	0.35	42	0
Distinct targets	6	0.35	42	0
Distinct targets	6	0.35	42	0
Distinct targets	6	0.35	42	0
Distinct targets	6	0.35	42	0
Distinct targets	6	0.35	42	0
Distinct targets	6	0.35	42	0
Distinct targets	6	0.35	42	0
Distinct targets	6	0.35	42	0
Distinct targets	6	0.35	42	0
Distinct targets	6	0.35	42	0
Distinct targets	6	0.35	42	0
Distinct targets	6	0.35	42	0
Distinct targets	6	0.35	42	0
Distinct targets	6	0.35	42	0
Distinct targets	6	0.35	42	0
Distinct targets	6	0.35	42	0
Distinct targets	6	0.35	42	0
Distinct targets	6	0.35	42	0
Distinct targets	6	0.35	42	0
Distinct targets	6	0.35	42	0
Distinct targets	6	0.35	42	0
Distinct targets	6	0.35	42	0
Distinct targets	6	0.35	42	0
Distinct targets	6	0.35	42	0
Distinct targets	6	0.35	42	0
Distinct targets	6	0.35	42	0
Distinct targets	6	0.35	42	0
Distinct targets	6	0.35	42	0
Distinct targets	6	0.35	42	0
Distinct targets	6	0.35	42	0
Distinct targets	6	0.35	42	0
Distinct targets	6	0.35	42	0
Distinct targets	6	0.35	42	0
Distinct targets	6	0.35	42	0
Distinct targets	6	0.35	42	0
Distinct targets	6	0.35	42	0
Distinct targets	6	0.35	42	0
Distinct targets	6	0.35	42	0
Distinct targets	6	0.35	42	0
Distinct targets	6	0.35	42	0
Distinct targets	6	0.35	42	0
Distinct targets	6	0.35	42	0
Distinct targets	6	0.35	42	0
Distinct targets	6	0.35	42	1
Distinct targets	6	0.35	42	1
Distinct targets	6	0.35	42	0
Distinct targets	6	0.35	42	0
Distinct targets	6	0.35	42	0
Distinct targets	6	0.35	42	0
Distinct targets	6	0.35	42	0
Distinct targets	6	0.35	42	0
Distinct targets	6	0.35	42	0
Distinct targets	6	0.35	42	0
Distinct targets	6	0.35	42	0
Distinct targets	6	0.35	42	0
Distinct targets	6	0.35	42	0
Distinct targets	6	0.35	42	0
Distinct targets	6	0.35	42	0
Distinct targets	6	0.35	42	0
Distinct targets	6	0.35	42	0
Distinct targets	6	0.35	42	0
Distinct targets	6	0.35	42	0
Distinct targets	6	0.35	42	0
Distinct targets	6	0.35	42	0
Distinct targets	6	0.35	42	0
Distinct targets	6	0.35	42	0
Distinct targets	6	0.35	42	0
Distinct targets	6	0.35	42	0
Distinct targets	6	0.35	42	0
Distinct targets	6	0.35	42	0
Distinct targets	6	0.35	42	0
Distinct targets	6	0.35	42	0
Distinct targets	6	0.35	42	0
Distinct targets	6	0.35	42	0
Distinct targets	6	0.35	42	0
Distinct targets	6	0.35	42	0
Distinct targets	6	0.35	42	0
Distinct targets	6	0.35	42	0
Distinct targets	6	0.35	42	0
Distinct targets	6	0.35	42	0
Distinct targets	6	0.35	42	0
Distinct targets	6	0.35	42	0
Distinct targets	6	0.35	42	0
Distinct targets	6	0.35	42	0
Distinct targets	6	0.35	42	0
Distinct targets	6	0.35	42	0
Distinct targets	6	0.35	42	0
Distinct targets	6	0.35	42	0
Distinct targets	6	0.35	42	0
Distinct targets	6	0.35	42	0
Distinct targets	6	0.35	42	0
Distinct targets	6	0.35	42	0
Distinct targets	6	0.35	42	0
Distinct targets	6	0.35	42	0
Distinct targets	6	0.35	42	0
Distinct targets	6	0.35	42	0
Distinct targets	6	0.35	42	0
Distinct targets	6	0.35	42	0
Distinct targets	6	0.35	42	0
Distinct targets	6	0.35	42	0
Distinct targets	6	0.35	42	0
Distinct targets	6	0.35	42	0
Distinct targets	6	0.35	42	0
Distinct targets	6	0.35	42	0
Distinct targets	6	0.35	42	0
Distinct targets	6	0.35	42	0
Distinct targets	6	0.35	42	0
Distinct targets	6	0.35	42	0
Distinct targets	6	0.35	42	0
Distinct targets	6	0.35	42	0
Distinct targets	6	0.35	42	0
Distinct targets	6	0.35	42	0
Distinct targets	6	0.35	42	0
Distinct targets	6	0.35	42	0
Distinct targets	6	0.35	42	0
Distinct targets	6	0.35	42	0
Distinct targets	6	0.35	42	0
Distinct targets	6	0.35	42	0
Distinct targets	6	0.35	42	0
Distinct targets	6	0.35	42	0
Distinct targets	6	0.35	42	0
Distinct targets	6	0.35	42	0
Distinct targets	6	0.35	42	0
Distinct targets	6	0.35	42	0
Distinct targets	6	0.35	42	0
Distinct targets	6	0.35	42	0
Distinct targets	6	0.35	42	0
Distinct targets	6	0.35	42	0
Distinct targets	6	0.35	42	0
Distinct targets	6	0.35	42	0
Distinct targets	6	0.35	42	0
Distinct targets	6	0.35	42	0
Distinct targets	6	0.35	42	0
Distinct targets	6	0.35	42	0
Distinct targets	6	0.35	42	0
Distinct targets	6	0.35	42	0
Distinct targets	6	0.35	42	0
Distinct targets	6	0.35	42	0
Distinct targets	6	0.35	42	0
Distinct targets	6	0.35	42	0
Distinct targets	6	0.35	42	0
Distinct targets	6	0.35	42	0
Distinct targets	6	0.35	42	0
Distinct targets	6	0.35	42	0
Distinct targets	6	0.35	42	0
Distinct targets	6	0.35	42	1
Distinct targets	6	0.35	42	1
Distinct targets	6	0.35	42	0
Distinct targets	6	0.35	42	0
Distinct targets	6	0.35	42	0
Distinct targets	6	0.35	42	0
Distinct targets	6	0.35	42	0
Distinct targets	6	0.35	42	0
Distinct targets	6	0.35	42	0
Distinct targets	6	0.35	42	0
Distinct targets	6	0.35	42	0
Distinct targets	6	0.35	42	0
Distinct targets	6	0.35	42	1
Distinct targets	6	0.35	42	1
Distinct targets	6	0.35	42	0
Distinct targets	6	0.35	42	0
Distinct targets	6	0.35	42	0
Distinct targets	6	0.35	42	0
Distinct targets	6	0.35	42	0
Distinct targets	6	0.35	42	0
Distinct targets	6	0.35	42	0
Distinct targets	6	0.35	42	0
Distinct targets	6	0.35	42	0
Distinct targets	6	0.35	42	0
Distinct targets	6	0.35	42	0
Distinct targets	6	0.35	42	0
Distinct targets	6	0.35	42	1
Distinct targets	6	0.35	42	1
Distinct targets	6	0.35	42	0
Distinct targets	6	0.35	42	0
Distinct targets	6	0.35	42	0
Distinct targets	6	0.35	42	0
Distinct targets	6	0.35	42	0
Distinct targets	6	0.35	42	0
Distinct targets	6	0.35	42	0
Distinct targets	6	0.35	42	0
Distinct targets	6	0.35	42	0
Distinct targets	6	0.35	42	0
Distinct targets	6	0.35	42	0
Distinct targets	6	0.35	42	0
Distinct targets	6	0.35	42	0
Distinct targets	6	0.35	42	0
Distinct targets	6	0.35	42	0
Distinct targets	6	0.35	42	0
Distinct targets	6	0.35	42	0
Distinct targets	6	0.35	42	0
Distinct targets	6	0.35	42	0
Distinct targets	6	0.35	42	0
Distinct targets	6	0.35	42	0
Distinct targets	6	0.35	42	0
Distinct targets	6	0.35	42	0
Distinct targets	6	0.35	42	0
Distinct targets	6	0.35	42	0
Distinct targets	6	0.35	42	0
Distinct targets	6	0.35	42	0
Distinct targets	6	0.35	42	0
Distinct targets	6	0.35	42	0
Distinct targets	6	0.35	42	0
Distinct targets	6	0.35	42	0
Distinct targets	6	0.35	42	0
Distinct targets	6	0.35	42	0
Distinct targets	6	0.35	42	0
Distinct targets	6	0.35	42	0
Distinct targets	6	0.35	42	0
Distinct targets	6	0.35	42	0
Distinct targets	6	0.35	42	0
Distinct targets	6	0.35	42	0
Distinct targets	6	0.35	42	0
Distinct targets	6	0.35	42	0
Distinct targets	6	0.35	42	0
Distinct targets	6	0.35	42	0
Distinct targets	6	0.35	42	0
Distinct targets	6	0.35	42	0
Distinct targets	6	0.35	42	0
Distinct targets	6	0.35	42	0
Distinct targets	6	0.35	42	0
Distinct targets	6	0.35	42	0
[truncated: 70,001 more rows]

## Sheet: psne_freq_vs_rho
case_name	rho	k_samples	psne_count	psne_frequency
Distinct targets	0.333333	1000	1000	1
Two players target 1	0.666667	1000	1000	1
All target 1	1	1000	1000	1

## Sheet: min_total_dev_vs_rho
case_name	rho	min_total_deviation
Distinct targets	0.333333	1
Two players target 1	0.666667	1
All target 1	1	3

## Sheet: pl_threshold_grid
theta	c	k_star
1.05	0.5	0.0229478
1.05	0.586207	0.0234885
1.05	0.672414	0.0238666
1.05	0.758621	0.0241206
1.05	0.844828	0.0242792
1.05	0.931034	0.0243641
1.05	1.01724	0.0243919
1.05	1.10345	0.0243754
1.05	1.18966	0.0243244
1.05	1.27586	0.0242467
1.05	1.36207	0.0241484
1.05	1.44828	0.0240343
1.05	1.53448	0.0239081
1.05	1.62069	0.023773
1.05	1.7069	0.0236314
1.05	1.7931	0.0234852
1.05	1.87931	0.0233359
1.05	1.96552	0.0231848
1.05	2.05172	0.0230329
1.05	2.13793	0.022881
1.05	2.22414	0.0227298
1.05	2.31034	0.0225797
1.05	2.39655	0.0224312
1.05	2.48276	0.0222846
1.05	2.56897	0.02214
1.05	2.65517	0.0219978
1.05	2.74138	0.0218581
1.05	2.82759	0.0217209
1.05	2.91379	0.0215863
1.05	3	0.0214544
1.1	0.5	0.0446429
1.1	0.586207	0.0457265
1.1	0.672414	0.0464939
1.1	0.758621	0.0470188
1.1	0.844828	0.0473563
1.1	0.931034	0.0475483
1.1	1.01724	0.047627
1.1	1.10345	0.0476172
1.1	1.18966	0.0475383
1.1	1.27586	0.0474054
1.1	1.36207	0.0472306
1.1	1.44828	0.0470232
1.1	1.53448	0.046791
1.1	1.62069	0.0465398
1.1	1.7069	0.0462747
1.1	1.7931	0.0459994
1.1	1.87931	0.0457171
1.1	1.96552	0.0454304
1.1	2.05172	0.0451412
1.1	2.13793	0.0448513
1.1	2.22414	0.044562
1.1	2.31034	0.0442742
1.1	2.39655	0.0439889
1.1	2.48276	0.0437068
1.1	2.56897	0.0434283
1.1	2.65517	0.0431539
1.1	2.74138	0.0428839
1.1	2.82759	0.0426185
1.1	2.91379	0.0423579
1.1	3	0.0421022
1.15	0.5	0.0651868
1.15	0.586207	0.0668124
1.15	0.672414	0.0679768
1.15	0.758621	0.0687856
1.15	0.844828	0.0693186
1.15	0.931034	0.0696364
1.15	1.01724	0.0697857
1.15	1.10345	0.0698029
1.15	1.18966	0.0697162
1.15	1.27586	0.0695481
1.15	1.36207	0.069316
1.15	1.44828	0.0690342
1.15	1.53448	0.0687138
1.15	1.62069	0.0683639
1.15	1.7069	0.0679917
1.15	1.7931	0.067603
1.15	1.87931	0.0672027
1.15	1.96552	0.0667945
1.15	2.05172	0.0663816
1.15	2.13793	0.0659664
1.15	2.22414	0.0655511
1.15	2.31034	0.0651372
1.15	2.39655	0.0647261
1.15	2.48276	0.0643188
1.15	2.56897	0.0639163
1.15	2.65517	0.063519
1.15	2.74138	0.0631276
1.15	2.82759	0.0627425
1.15	2.91379	0.062364
1.15	3	0.0619922
1.2	0.5	0.0846702
1.2	0.586207	0.0868344
1.2	0.672414	0.0884004
1.2	0.758621	0.0895032
1.2	0.844828	0.090245
1.2	0.931034	0.0907042
1.2	1.01724	0.0909411
1.2	1.10345	0.0910028
1.2	1.18966	0.0909261
1.2	1.27586	0.0907403
1.2	1.36207	0.0904683
1.2	1.44828	0.0901288
1.2	1.53448	0.0897366
1.2	1.62069	0.0893035
1.2	1.7069	0.0888392
1.2	1.7931	0.0883515
1.2	1.87931	0.0878468
1.2	1.96552	0.0873302
1.2	2.05172	0.0868059
1.2	2.13793	0.0862774
1.2	2.22414	0.0857473
1.2	2.31034	0.085218
1.2	2.39655	0.0846912
1.2	2.48276	0.0841685
1.2	2.56897	0.0836511
1.2	2.65517	0.0831398
1.2	2.74138	0.0826354
1.2	2.82759	0.0821385
1.2	2.91379	0.0816495
1.2	3	0.0811688
1.25	0.5	0.103175
1.25	0.586207	0.105872
1.25	0.672414	0.107842
1.25	0.758621	0.109246
1.25	0.844828	0.110207
1.25	0.931034	0.110821
1.25	1.01724	0.11116
1.25	1.10345	0.111281
1.25	1.18966	0.11123
1.25	1.27586	0.111042
1.25	1.36207	0.110746
1.25	1.44828	0.110364
1.25	1.53448	0.109914
1.25	1.62069	0.109412
1.25	1.7069	0.108869
1.25	1.7931	0.108296
1.25	1.87931	0.107699
1.25	1.96552	0.107086
1.25	2.05172	0.106462
1.25	2.13793	0.105831
1.25	2.22414	0.105197
1.25	2.31034	0.104562
1.25	2.39655	0.103929
1.25	2.48276	0.1033
1.25	2.56897	0.102676
1.25	2.65517	0.102059
1.25	2.74138	0.101449
1.25	2.82759	0.100848
1.25	2.91379	0.100256
1.25	3	0.0996732
1.3	0.5	0.120773
1.3	0.586207	0.123997
1.3	0.672414	0.12637
1.3	0.758621	0.128081
1.3	0.844828	0.129271
1.3	0.931034	0.13005
1.3	1.01724	0.130503
1.3	1.10345	0.130697
1.3	1.18966	0.130685
1.3	1.27586	0.130509
1.3	1.36207	0.130202
1.3	1.44828	0.129791
1.3	1.53448	0.129297
1.3	1.62069	0.128739
1.3	1.7069	0.12813
1.3	1.7931	0.127483
1.3	1.87931	0.126806
1.3	1.96552	0.126107
1.3	2.05172	0.125394
1.3	2.13793	0.12467
1.3	2.22414	0.123942
1.3	2.31034	0.12321
1.3	2.39655	0.12248
1.3	2.48276	0.121753
1.3	2.56897	0.121031
1.3	2.65517	0.120316
1.3	2.74138	0.119609
1.3	2.82759	0.11891
1.3	2.91379	0.118221
1.3	3	0.117543
1.35	0.5	0.137531
1.35	0.586207	0.141273
1.35	0.672414	0.144049
1.35	0.758621	0.14607
1.35	0.844828	0.147494
1.35	0.931034	0.148448
1.35	1.01724	0.149026
1.35	1.10345	0.149304
1.35	1.18966	0.149343
1.35	1.27586	0.149191
1.35	1.36207	0.148885
1.35	1.44828	0.148457
1.35	1.53448	0.147932
1.35	1.62069	0.147329
1.35	1.7069	0.146666
1.35	1.7931	0.145955
1.35	1.87931	0.145209
1.35	1.96552	0.144435
1.35	2.05172	0.143642
1.35	2.13793	0.142836
1.35	2.22414	0.142021
1.35	2.31034	0.141202
1.35	2.39655	0.140383
1.35	2.48276	0.139566
1.35	2.56897	0.138754
1.35	2.65517	0.137947
1.35	2.74138	0.137149
1.35	2.82759	0.13636
1.35	2.91379	0.135581
1.35	3	0.134813
1.4	0.5	0.153509
1.4	0.586207	0.15776
1.4	0.672414	0.160936
1.4	0.758621	0.163268
1.4	0.844828	0.164933
1.4	0.931034	0.166068
1.4	1.01724	0.166779
1.4	1.10345	0.167152
1.4	1.18966	0.167253
1.4	1.27586	0.167135
1.4	1.36207	0.166842
1.4	1.44828	0.166408
1.4	1.53448	0.165861
1.4	1.62069	0.165225
1.4	1.7069	0.164517
1.4	1.7931	0.163754
1.4	1.87931	0.162947
1.4	1.96552	0.162108
1.4	2.05172	0.161244
1.4	2.13793	0.160364
1.4	2.22414	0.159472
1.4	2.31034	0.158573
1.4	2.39655	0.157673
1.4	2.48276	0.156773
1.4	2.56897	0.155877
1.4	2.65517	0.154987
1.4	2.74138	0.154104
1.4	2.82759	0.15323
1.4	2.91379	0.152367
1.4	3	0.151515
1.45	0.5	0.16876
1.45	0.586207	0.17351
1.45	0.672414	0.177083
1.45	0.758621	0.179728
1.45	0.844828	0.181636
1.45	0.931034	0.182959
1.45	1.01724	0.183811
1.45	1.10345	0.184286
1.45	1.18966	0.184458
1.45	1.27586	0.184385
1.45	1.36207	0.184114
1.45	1.44828	0.183683
1.45	1.53448	0.183125
1.45	1.62069	0.182464
1.45	1.7069	0.181722
1.45	1.7931	0.180915
1.45	1.87931	0.180057
1.45	1.96552	0.17916
1.45	2.05172	0.178235
1.45	2.13793	0.177288
1.45	2.22414	0.176327
1.45	2.31034	0.175356
1.45	2.39655	0.174381
1.45	2.48276	0.173406
1.45	2.56897	0.172433
1.45	2.65517	0.171465
1.45	2.74138	0.170504
1.45	2.82759	0.169552
1.45	2.91379	0.16861
1.45	3	0.167679
1.5	0.5	0.183333
1.5	0.586207	0.188573
1.5	0.672414	0.192538
1.5	0.758621	0.195495
1.5	0.844828	0.19765
1.5	0.931034	0.199164
1.5	1.01724	0.200164
1.5	1.10345	0.200749
1.5	1.18966	0.200999
1.5	1.27586	0.200979
1.5	1.36207	0.200739
1.5	1.44828	0.200321
1.5	1.53448	0.19976
1.5	1.62069	0.199084
1.5	1.7069	0.198315
1.5	1.7931	0.197473
1.5	1.87931	0.196572
1.5	1.96552	0.195627
1.5	2.05172	0.194646
1.5	2.13793	0.193641
1.5	2.22414	0.192617
1.5	2.31034	0.191582
1.5	2.39655	0.19054
1.5	2.48276	0.189495
1.5	2.56897	0.188451
1.5	2.65517	0.187411
1.5	2.74138	0.186377
1.5	2.82759	0.185352
1.5	2.91379	0.184337
1.5	3	0.183333
1.55	0.5	0.197274
1.55	0.586207	0.202994
1.55	0.672414	0.207345
1.55	0.758621	0.210612
1.55	0.844828	0.213015
1.55	0.931034	0.214725
1.55	1.01724	0.215878
1.55	1.10345	0.216579
1.55	1.18966	0.216915
1.55	1.27586	0.216954
1.55	1.36207	0.216753
1.55	1.44828	0.216356
1.55	1.53448	0.215801
1.55	1.62069	0.215117
1.55	1.7069	0.21433
1.55	1.7931	0.213459
1.55	1.87931	0.212524
1.55	1.96552	0.211536
1.55	2.05172	0.210509
1.55	2.13793	0.209452
1.55	2.22414	0.208373
1.55	2.31034	0.207278
1.55	2.39655	0.206175
1.55	2.48276	0.205067
1.55	2.56897	0.203958
1.55	2.65517	0.202852
1.55	2.74138	0.201751
1.55	2.82759	0.200658
1.55	2.91379	0.199575
1.55	3	0.198502
1.6	0.5	0.210623
1.6	0.586207	0.216811
1.6	0.672414	0.221544
1.6	0.758621	0.22512
1.6	0.844828	0.227771
1.6	0.931034	0.22968
1.6	1.01724	0.230989
1.6	1.10345	0.231812
1.6	1.18966	0.232239
1.6	1.27586	0.232346
1.6	1.36207	0.23219
1.6	1.44828	0.231821
1.6	1.53448	0.231278
1.6	1.62069	0.230594
1.6	1.7069	0.229795
1.6	1.7931	0.228905
1.6	1.87931	0.22794
1.6	1.96552	0.226918
1.6	2.05172	0.22585
1.6	2.13793	0.224748
1.6	2.22414	0.223619
1.6	2.31034	0.222472
1.6	2.39655	0.221313
1.6	2.48276	0.220148
1.6	2.56897	0.21898
1.6	2.65517	0.217813
1.6	2.74138	0.21665
1.6	2.82759	0.215494
1.6	2.91379	0.214347
1.6	3	0.213211
1.65	0.5	0.223417
1.65	0.586207	0.230063
1.65	0.672414	0.235171
1.65	0.758621	0.239053
1.65	0.844828	0.241954
1.65	0.931034	0.244063
1.65	1.01724	0.245532
1.65	1.10345	0.24648
1.65	1.18966	0.247005
1.65	1.27586	0.247184
1.65	1.36207	0.24708
1.65	1.44828	0.246745
1.65	1.53448	0.246221
1.65	1.62069	0.245543
1.65	1.7069	0.24474
1.65	1.7931	0.243836
1.65	1.87931	0.24285
1.65	1.96552	0.241798
1.65	2.05172	0.240696
1.65	2.13793	0.239554
1.65	2.22414	0.238382
1.65	2.31034	0.237189
1.65	2.39655	0.23598
1.65	2.48276	0.234762
1.65	2.56897	0.233539
1.65	2.65517	0.232317
1.65	2.74138	0.231097
1.65	2.82759	0.229882
1.65	2.91379	0.228676
1.65	3	0.22748
1.7	0.5	0.23569
1.7	0.586207	0.242785
1.7	0.672414	0.248261
1.7	0.758621	0.252447
1.7	0.844828	0.255595
1.7	0.931034	0.257906
1.7	1.01724	0.259538
1.7	1.10345	0.260616
1.7	1.18966	0.261242
1.7	1.27586	0.261499
1.7	1.36207	0.261452
1.7	1.44828	0.261157
1.7	1.53448	0.260658
1.7	1.62069	0.259993
1.7	1.7069	0.259191
1.7	1.7931	0.258278
1.7	1.87931	0.257276
1.7	1.96552	0.256202
1.7	2.05172	0.255071
1.7	2.13793	0.253895
1.7	2.22414	0.252685
1.7	2.31034	0.25145
1.7	2.39655	0.250197
1.7	2.48276	0.248931
1.7	2.56897	0.247659
1.7	2.65517	0.246385
1.7	2.74138	0.245112
1.7	2.82759	0.243844
1.7	2.91379	0.242583
1.7	3	0.241332
1.75	0.5	0.247475
1.75	0.586207	0.255006
1.75	0.672414	0.260845
1.75	0.758621	0.265331
1.75	0.844828	0.268726
1.75	0.931034	0.27124
1.75	1.01724	0.273036
1.75	1.10345	0.274247
1.75	1.18966	0.274979
1.75	1.27586	0.275317
1.75	1.36207	0.275333
1.75	1.44828	0.275083
1.75	1.53448	0.274614
1.75	1.62069	0.273966
1.75	1.7069	0.273171
1.75	1.7931	0.272256
1.75	1.87931	0.271244
1.75	1.96552	0.270152
1.75	2.05172	0.268997
1.75	2.13793	0.267793
1.75	2.22414	0.26655
1.75	2.31034	0.265278
1.75	2.39655	0.263985
1.75	2.48276	0.262677
1.75	2.56897	0.26136
1.75	2.65517	0.260039
1.75	2.74138	0.258718
1.75	2.82759	0.2574
1.75	2.91379	0.256088
1.75	3	0.254785
1.8	0.5	0.258799
1.8	0.586207	0.266758
1.8	0.672414	0.272952
1.8	0.758621	0.277734
1.8	0.844828	0.281375
1.8	0.931034	0.284091
1.8	1.01724	0.286054
1.8	1.10345	0.2874
1.8	1.18966	0.28824
1.8	1.27586	0.288665
1.8	1.36207	0.288747
1.8	1.44828	0.288547
1.8	1.53448	0.288113
1.8	1.62069	0.287488
1.8	1.7069	0.286705
1.8	1.7931	0.285792
1.8	1.87931	0.284774
1.8	1.96552	0.28367
1.8	2.05172	0.282497
1.8	2.13793	0.281269
1.8	2.22414	0.279997
1.8	2.31034	0.278693
1.8	2.39655	0.277364
1.8	2.48276	0.276018
1.8	2.56897	0.274661
1.8	2.65517	0.273297
1.8	2.74138	0.271931
1.8	2.82759	0.270568
1.8	2.91379	0.269209
1.8	3	0.267857
1.85	0.5	0.26969
1.85	0.586207	0.278065
1.85	0.672414	0.284609
1.85	0.758621	0.289682
1.85	0.844828	0.293567
1.85	0.931034	0.296486
1.85	1.01724	0.298616
1.85	1.10345	0.300099
1.85	1.18966	0.301052
1.85	1.27586	0.301566
1.85	1.36207	0.301718
1.85	1.44828	0.301571
1.85	1.53448	0.301177
1.85	1.62069	0.300579
1.85	1.7069	0.299812
1.85	1.7931	0.298907
1.85	1.87931	0.297888
1.85	1.96552	0.296776
1.85	2.05172	0.295589
1.85	2.13793	0.294341
1.85	2.22414	0.293046
1.85	2.31034	0.291714
1.85	2.39655	0.290354
1.85	2.48276	0.288974
1.85	2.56897	0.28758
1.85	2.65517	0.286177
1.85	2.74138	0.284771
1.85	2.82759	0.283365
1.85	2.91379	0.281962
1.85	3	0.280566
1.9	0.5	0.280172
1.9	0.586207	0.288954
1.9	0.672414	0.29584
1.9	0.758621	0.301201
1.9	0.844828	0.305327
1.9	0.931034	0.308448
1.9	1.01724	0.310746
1.9	1.10345	0.312369
1.9	1.18966	0.313435
1.9	1.27586	0.314041
1.9	1.36207	0.314267
1.9	1.44828	0.314178
1.9	1.53448	0.313827
1.9	1.62069	0.31326
1.9	1.7069	0.312514
1.9	1.7931	0.31162
1.9	1.87931	0.310604
1.9	1.96552	0.309489
1.9	2.05172	0.308292
1.9	2.13793	0.307029
1.9	2.22414	0.305714
1.9	2.31034	0.304359
1.9	2.39655	0.302971
1.9	2.48276	0.301561
1.9	2.56897	0.300133
1.9	2.65517	0.298696
1.9	2.74138	0.297252
1.9	2.82759	0.295808
1.9	2.91379	0.294365
1.9	3	0.292928
1.95	0.5	0.290269
1.95	0.586207	0.299447
1.95	0.672414	0.306669
1.95	0.758621	0.312313
1.95	0.844828	0.316678
1.95	0.931034	0.32
1.95	1.01724	0.322467
1.95	1.10345	0.324229
1.95	1.18966	0.325411
1.95	1.27586	0.326113
1.95	1.36207	0.326415
1.95	1.44828	0.326387
1.95	1.53448	0.326083
1.95	1.62069	0.325551
1.95	1.7069	0.324829
1.95	1.7931	0.32395
1.95	1.87931	0.322942
1.95	1.96552	0.321826
1.95	2.05172	0.320623
1.95	2.13793	0.31935
1.95	2.22414	0.318019
1.95	2.31034	0.316643
1.95	2.39655	0.315232
1.95	2.48276	0.313795
1.95	2.56897	0.312338
1.95	2.65517	0.310869
1.95	2.74138	0.309392
1.95	2.82759	0.307912
1.95	2.91379	0.306432
1.95	3	0.304956
2	0.5	0.3
2	0.586207	0.309565
2	0.672414	0.317116
2	0.758621	0.323039
2	0.844828	0.327641
2	0.931034	0.331162
2	1.01724	0.333797
2	1.10345	0.335701
2	1.18966	0.337001
2	1.27586	0.337799
2	1.36207	0.338181
2	1.44828	0.338216
2	1.53448	0.337963
2	1.62069	0.337469
2	1.7069	0.336775
2	1.7931	0.335915
2	1.87931	0.334917
2	1.96552	0.333805
2	2.05172	0.3326
2	2.13793	0.331319
2	2.22414	0.329976
2	2.31034	0.328583
2	2.39655	0.327152
2	2.48276	0.325692
2	2.56897	0.324209
2	2.65517	0.322711
2	2.74138	0.321204
2	2.82759	0.319691
2	2.91379	0.318178
2	3	0.316667
2.05	0.5	0.309386
2.05	0.586207	0.319329
2.05	0.672414	0.327201
2.05	0.758621	0.333399
2.05	0.844828	0.338235
2.05	0.931034	0.341955
2.05	1.01724	0.344758
2.05	1.10345	0.346803
2.05	1.18966	0.348222
2.05	1.27586	0.349119
2.05	1.36207	0.349582
2.05	1.44828	0.349683
2.05	1.53448	0.349483
2.05	1.62069	0.34903
2.05	1.7069	0.348368
2.05	1.7931	0.34753
2.05	1.87931	0.346546
2.05	1.96552	0.345441
2.05	2.05172	0.344237
2.05	2.13793	0.342952
2.05	2.22414	0.3416
2.05	2.31034	0.340194
2.05	2.39655	0.338746
2.05	2.48276	0.337266
2.05	2.56897	0.33576
2.05	2.65517	0.334237
2.05	2.74138	0.332702
2.05	2.82759	0.33116
2.05	2.91379	0.329615
2.05	3	0.328072
2.1	0.5	0.318445
2.1	0.586207	0.328756
2.1	0.672414	0.336944
2.1	0.758621	0.343412
2.1	0.844828	0.348478
2.1	0.931034	0.352395
2.1	1.01724	0.355365
2.1	1.10345	0.357553
2.1	1.18966	0.359091
2.1	1.27586	0.360089
2.1	1.36207	0.360635
2.1	1.44828	0.360805
2.1	1.53448	0.36066
2.1	1.62069	0.360252
2.1	1.7069	0.359623
2.1	1.7931	0.35881
2.1	1.87931	0.357844
2.1	1.96552	0.356749
2.1	2.05172	0.35555
2.1	2.13793	0.354263
2.1	2.22414	0.352905
2.1	2.31034	0.351489
2.1	2.39655	0.350028
2.1	2.48276	0.34853
2.1	2.56897	0.347005
2.1	2.65517	0.345459
2.1	2.74138	0.343899
2.1	2.82759	0.34233
2.1	2.91379	0.340757
2.1	3	0.339184
2.15	0.5	0.327194
2.15	0.586207	0.337864
2.15	0.672414	0.346361
2.15	0.758621	0.353094
2.15	0.844828	0.358388
2.15	0.931034	0.3625
2.15	1.01724	0.365637
2.15	1.10345	0.367967
2.15	1.18966	0.369626
2.15	1.27586	0.370725
2.15	1.36207	0.371357
2.15	1.44828	0.371597
2.15	1.53448	0.37151
2.15	1.62069	0.371148
2.15	1.7069	0.370556
2.15	1.7931	0.369771
2.15	1.87931	0.368824
2.15	1.96552	0.367743
2.15	2.05172	0.366551
2.15	2.13793	0.365266
2.15	2.22414	0.363905
2.15	2.31034	0.362482
2.15	2.39655	0.361009
2.15	2.48276	0.359497
2.15	2.56897	0.357955
2.15	2.65517	0.356389
2.15	2.74138	0.354807
2.15	2.82759	0.353215
2.15	2.91379	0.351616
2.15	3	0.350015
2.2	0.5	0.335648
2.2	0.586207	0.346669
2.2	0.672414	0.355468
2.2	0.758621	0.362462
2.2	0.844828	0.367981
2.2	0.931034	0.372286
2.2	1.01724	0.375589
2.2	1.10345	0.378061
2.2	1.18966	0.379841
2.2	1.27586	0.381043
2.2	1.36207	0.381761
2.2	1.44828	0.382074
2.2	1.53448	0.382047
2.2	1.62069	0.381733
2.2	1.7069	0.38118
2.2	1.7931	0.380425
2.2	1.87931	0.379501
2.2	1.96552	0.378436
2.2	2.05172	0.377254
2.2	2.13793	0.375973
2.2	2.22414	0.374612
2.2	2.31034	0.373184
2.2	2.39655	0.371703
2.2	2.48276	0.37018
2.2	2.56897	0.368623
2.2	2.65517	0.36704
2.2	2.74138	0.365439
2.2	2.82759	0.363824
2.2	2.91379	0.362202
2.2	3	0.360577
2.25	0.5	0.343823
2.25	0.586207	0.355186
2.25	0.672414	0.364281
2.25	0.758621	0.371531
2.25	0.844828	0.377271
2.25	0.931034	0.381768
2.25	1.01724	0.385236
2.25	1.10345	0.387849
2.25	1.18966	0.38975
2.25	1.27586	0.391056
2.25	1.36207	0.391862
2.25	1.44828	0.392249
2.25	1.53448	0.392283
2.25	1.62069	0.392021
2.25	1.7069	0.391508
2.25	1.7931	0.390786
2.25	1.87931	0.389887
2.25	1.96552	0.388841
2.25	2.05172	0.38767
2.25	2.13793	0.386397
2.25	2.22414	0.385037
2.25	2.31034	0.383608
2.25	2.39655	0.382122
2.25	2.48276	0.380589
2.25	2.56897	0.37902
2.25	2.65517	0.377422
2.25	2.74138	0.375804
2.25	2.82759	0.37417
2.25	2.91379	0.372527
2.25	3	0.370879
2.3	0.5	0.351732
2.3	0.586207	0.363429
2.3	0.672414	0.372813
2.3	0.758621	0.380315
2.3	0.844828	0.386273
2.3	0.931034	0.390959
2.3	1.01724	0.39459
2.3	1.10345	0.397345
2.3	1.18966	0.399368
2.3	1.27586	0.400777
2.3	1.36207	0.401672
2.3	1.44828	0.402134
2.3	1.53448	0.402232
2.3	1.62069	0.402022
2.3	1.7069	0.401553
2.3	1.7931	0.400866
2.3	1.87931	0.399994
2.3	1.96552	0.398968
2.3	2.05172	0.397812
2.3	2.13793	0.396548
2.3	2.22414	0.395193
2.3	2.31034	0.393764
2.3	2.39655	0.392274
2.3	2.48276	0.390735
2.3	2.56897	0.389156
2.3	2.65517	0.387546
2.3	2.74138	0.385913
2.3	2.82759	0.384263
2.3	2.91379	0.382601
2.3	3	0.380932
2.35	0.5	0.359387
2.35	0.586207	0.37141
2.35	0.672414	0.381079
2.35	0.758621	0.388827
2.35	0.844828	0.395
2.35	0.931034	0.399873
2.35	1.01724	0.403667
2.35	1.10345	0.406562
2.35	1.18966	0.408706
2.35	1.27586	0.41022
2.35	1.36207	0.411205
2.35	1.44828	0.411744
2.35	1.53448	0.411906
2.35	1.62069	0.41175
2.35	1.7069	0.411326
2.35	1.7931	0.410676
2.35	1.87931	0.409833
2.35	1.96552	0.40883
2.35	2.05172	0.407691
2.35	2.13793	0.406438
2.35	2.22414	0.40509
2.35	2.31034	0.403664
2.35	2.39655	0.402173
2.35	2.48276	0.400629
2.35	2.56897	0.399042
2.35	2.65517	0.397422
2.35	2.74138	0.395776
2.35	2.82759	0.394111
2.35	2.91379	0.392432
2.35	3	0.390745
2.4	0.5	0.366802
2.4	0.586207	0.379143
2.4	0.672414	0.389089
2.4	0.758621	0.39708
2.4	0.844828	0.403465
2.4	0.931034	0.408522
2.4	1.01724	0.412477
2.4	1.10345	0.415512
2.4	1.18966	0.417777
2.4	1.27586	0.419396
2.4	1.36207	0.420472
2.4	1.44828	0.421088
2.4	1.53448	0.421316
2.4	1.62069	0.421216
2.4	1.7069	0.420838
2.4	1.7931	0.420226
2.4	1.87931	0.419415
2.4	1.96552	0.418436
2.4	2.05172	0.417316
2.4	2.13793	0.416076
2.4	2.22414	0.414738
2.4	2.31034	0.413316
2.4	2.39655	0.411826
2.4	2.48276	0.410279
2.4	2.56897	0.408687
2.4	2.65517	0.407059
2.4	2.74138	0.405402
2.4	2.82759	0.403724
2.4	2.91379	0.402031
2.4	3	0.400327
2.45	0.5	0.373987
2.45	0.586207	0.386638
2.45	0.672414	0.396856
2.45	0.758621	0.405085
2.45	0.844828	0.411679
2.45	0.931034	0.416918
2.45	1.01724	0.421032
2.45	1.10345	0.424206
2.45	1.18966	0.426593
2.45	1.27586	0.428317
2.45	1.36207	0.429483
2.45	1.44828	0.430177
2.45	1.53448	0.430472
2.45	1.62069	0.43043
2.45	1.7069	0.4301
2.45	1.7931	0.429528
2.45	1.87931	0.42875
2.45	1.96552	0.427797
2.45	2.05172	0.426697
2.45	2.13793	0.425473
2.45	2.22414	0.424145
2.45	2.31034	0.42273
2.45	2.39655	0.421243
2.45	2.48276	0.419696
2.45	2.56897	0.4181
2.45	2.65517	0.416465
2.45	2.74138	0.4148
2.45	2.82759	0.413111
2.45	2.91379	0.411405
2.45	3	0.409686
2.5	0.5	0.380952
2.5	0.586207	0.393907
2.5	0.672414	0.404391
2.5	0.758621	0.412854
2.5	0.844828	0.419652
2.5	0.931034	0.425072
2.5	1.01724	0.429344
2.5	1.10345	0.432656
2.5	1.18966	0.435163
2.5	1.27586	0.436992
2.5	1.36207	0.438249
2.5	1.44828	0.439023
2.5	1.53448	0.439386
2.5	1.62069	0.439401
2.5	1.7069	0.439121
2.5	1.7931	0.43859
2.5	1.87931	0.437846
2.5	1.96552	0.436922
2.5	2.05172	0.435845
2.5	2.13793	0.434638
2.5	2.22414	0.433322
2.5	2.31034	0.431916
2.5	2.39655	0.430433
2.5	2.48276	0.428887
2.5	2.56897	0.42729
2.5	2.65517	0.425651
2.5	2.74138	0.423978
2.5	2.82759	0.42228
2.5	2.91379	0.420563
2.5	3	0.418831
2.55	0.5	0.387709
2.55	0.586207	0.400959
2.55	0.672414	0.411704
2.55	0.758621	0.420396
2.55	0.844828	0.427396
2.55	0.931034	0.432994
2.55	1.01724	0.437421
2.55	1.10345	0.440871
2.55	1.18966	0.443498
2.55	1.27586	0.445432
2.55	1.36207	0.446781
2.55	1.44828	0.447634
2.55	1.53448	0.448066
2.55	1.62069	0.448141
2.55	1.7069	0.447911
2.55	1.7931	0.447423
2.55	1.87931	0.446715
2.55	1.96552	0.44582
2.55	2.05172	0.444766
2.55	2.13793	0.443579
2.55	2.22414	0.442277
2.55	2.31034	0.440881
2.55	2.39655	0.439404
2.55	2.48276	0.437862
2.55	2.56897	0.436264
2.55	2.65517	0.434622
2.55	2.74138	0.432945
2.55	2.82759	0.431239
2.55	2.91379	0.429512
2.55	3	0.427769
2.6	0.5	0.394265
2.6	0.586207	0.407805
2.6	0.672414	0.418805
2.6	0.758621	0.427722
2.6	0.844828	0.434921
2.6	0.931034	0.440693
2.6	1.01724	0.445276
2.6	1.10345	0.448861
2.6	1.18966	0.451608
2.6	1.27586	0.453647
2.6	1.36207	0.455087
2.6	1.44828	0.45602
2.6	1.53448	0.456522
2.6	1.62069	0.456656
2.6	1.7069	0.456478
2.6	1.7931	0.456034
2.6	1.87931	0.455363
2.6	1.96552	0.454499
2.6	2.05172	0.453471
2.6	2.13793	0.452304
2.6	2.22414	0.451018
2.6	2.31034	0.449633
2.6	2.39655	0.448165
2.6	2.48276	0.446627
2.6	2.56897	0.445031
2.6	2.65517	0.443388
2.6	2.74138	0.441707
2.6	2.82759	0.439995
2.6	2.91379	0.43826
2.6	3	0.436508
2.65	0.5	0.400631
2.65	0.586207	0.414452
2.65	0.672414	0.425702
2.65	0.758621	0.434841
2.65	0.844828	0.442235
2.65	0.931034	0.44818
2.65	1.01724	0.452915
2.65	1.10345	0.456635
2.65	1.18966	0.459501
2.65	1.27586	0.461644
2.65	1.36207	0.463177
2.65	1.44828	0.46419
2.65	1.53448	0.464762
2.65	1.62069	0.464957
2.65	1.7069	0.464832
2.65	1.7931	0.464433
2.65	1.87931	0.4638
2.65	1.96552	0.462968
2.65	2.05172	0.461967
2.65	2.13793	0.460821
2.65	2.22414	0.459553
2.65	2.31034	0.458181
2.65	2.39655	0.456722
2.65	2.48276	0.45519
2.65	2.56897	0.453598
2.65	2.65517	0.451955
2.65	2.74138	0.450272
2.65	2.82759	0.448556
2.65	2.91379	0.446815
2.65	3	0.445054
2.7	0.5	0.406813
2.7	0.586207	0.420911
2.7	0.672414	0.432405
2.7	0.758621	0.44176
2.7	0.844828	0.449347
2.7	0.931034	0.455462
2.7	1.01724	0.460348
2.7	1.10345	0.464202
2.7	1.18966	0.467186
2.7	1.27586	0.469434
2.7	1.36207	0.471058
2.7	1.44828	0.472152
2.7	1.53448	0.472794
2.7	1.62069	0.473051
2.7	1.7069	0.472979
2.7	1.7931	0.472626
2.7	1.87931	0.472033
2.7	1.96552	0.471234
2.7	2.05172	0.470261
2.7	2.13793	0.469138
2.7	2.22414	0.467889
2.7	2.31034	0.466531
2.7	2.39655	0.465083
2.7	2.48276	0.463559
2.7	2.56897	0.461971
2.7	2.65517	0.46033
2.7	2.74138	0.458646
2.7	2.82759	0.456928
2.7	2.91379	0.455181
2.7	3	0.453414
2.75	0.5	0.412821
2.75	0.586207	0.427188
2.75	0.672414	0.438922
2.75	0.758621	0.44849
2.75	0.844828	0.456265
2.75	0.931034	0.462549
2.75	1.01724	0.467584
2.75	1.10345	0.47157
2.75	1.18966	0.474671
2.75	1.27586	0.477023
2.75	1.36207	0.478739
2.75	1.44828	0.479913
2.75	1.53448	0.480627
2.75	1.62069	0.480946
2.75	1.7069	0.480928
2.75	1.7931	0.480622
2.75	1.87931	0.480069
2.75	1.96552	0.479305
2.75	2.05172	0.478361
2.75	2.13793	0.477262
2.75	2.22414	0.476033
2.75	2.31034	0.474691
2.75	2.39655	0.473255
2.75	2.48276	0.47174
2.75	2.56897	0.470158
2.75	2.65517	0.46852
2.75	2.74138	0.466837
2.75	2.82759	0.465117
2.75	2.91379	0.463367
2.75	3	0.461594
2.8	0.5	0.41866
2.8	0.586207	0.433291
2.8	0.672414	0.445259
2.8	0.758621	0.455036
2.8	0.844828	0.462998
2.8	0.931034	0.469447
2.8	1.01724	0.47463
2.8	1.10345	0.478747
2.8	1.18966	0.481964
2.8	1.27586	0.484419
2.8	1.36207	0.486227
2.8	1.44828	0.487482
2.8	1.53448	0.488267
2.8	1.62069	0.488648
2.8	1.7069	0.488685
2.8	1.7931	0.488427
2.8	1.87931	0.487915
2.8	1.96552	0.487187
2.8	2.05172	0.486273
2.8	2.13793	0.4852
2.8	2.22414	0.483991
2.8	2.31034	0.482667
2.8	2.39655	0.481245
2.8	2.48276	0.47974
2.8	2.56897	0.478165
2.8	2.65517	0.476532
2.8	2.74138	0.47485
2.8	2.82759	0.47313
2.8	2.91379	0.471378
2.8	3	0.469601
2.85	0.5	0.424339
2.85	0.586207	0.439228
2.85	0.672414	0.451426
2.85	0.758621	0.461408
2.85	0.844828	0.469552
2.85	0.931034	0.476165
2.85	1.01724	0.481493
2.85	1.10345	0.48574
2.85	1.18966	0.489073
2.85	1.27586	0.491631
2.85	1.36207	0.493529
2.85	1.44828	0.494866
2.85	1.53448	0.495722
2.85	1.62069	0.496166
2.85	1.7069	0.496259
2.85	1.7931	0.496049
2.85	1.87931	0.495579
2.85	1.96552	0.494887
2.85	2.05172	0.494004
2.85	2.13793	0.492958
2.85	2.22414	0.491771
2.85	2.31034	0.490465
2.85	2.39655	0.489057
2.85	2.48276	0.487564
2.85	2.56897	0.485997
2.85	2.65517	0.48437
2.85	2.74138	0.482692
2.85	2.82759	0.480972
2.85	2.91379	0.479219
2.85	3	0.477439
2.9	0.5	0.429864
2.9	0.586207	0.445005
2.9	0.672414	0.457428
2.9	0.758621	0.467611
2.9	0.844828	0.475935
2.9	0.931034	0.482708
2.9	1.01724	0.48818
2.9	1.10345	0.492555
2.9	1.18966	0.496003
2.9	1.27586	0.498663
2.9	1.36207	0.500653
2.9	1.44828	0.50207
2.9	1.53448	0.502998
2.9	1.62069	0.503506
2.9	1.7069	0.503654
2.9	1.7931	0.503493
2.9	1.87931	0.503066
2.9	1.96552	0.502412
2.9	2.05172	0.501561
2.9	2.13793	0.500542
2.9	2.22414	0.499378
2.9	2.31034	0.498091
2.9	2.39655	0.4967
2.9	2.48276	0.495218
2.9	2.56897	0.493661
2.9	2.65517	0.492041
2.9	2.74138	0.490367
2.9	2.82759	0.48865
2.9	2.91379	0.486897
2.9	3	0.485115
2.95	0.5	0.435241
2.95	0.586207	0.450628
2.95	0.672414	0.463271
2.95	0.758621	0.473652
2.95	0.844828	0.482153
2.95	0.931034	0.489085
2.95	1.01724	0.494699
2.95	1.10345	0.499201
2.95	1.18966	0.502762
2.95	1.27586	0.505524
2.95	1.36207	0.507604
2.95	1.44828	0.509102
2.95	1.53448	0.510102
2.95	1.62069	0.510673
2.95	1.7069	0.510878
2.95	1.7931	0.510766
2.95	1.87931	0.510383
2.95	1.96552	0.509766
2.95	2.05172	0.508948
2.95	2.13793	0.507958
2.95	2.22414	0.506818
2.95	2.31034	0.505552
2.95	2.39655	0.504177
2.95	2.48276	0.502709
2.95	2.56897	0.501163
2.95	2.65517	0.49955
2.95	2.74138	0.497882
2.95	2.82759	0.496168
2.95	2.91379	0.494416
2.95	3	0.492634
3	0.5	0.440476
3	0.586207	0.456104
3	0.672414	0.468963
3	0.758621	0.479538
3	0.844828	0.488213
3	0.931034	0.495301
3	1.01724	0.501055
3	1.10345	0.505683
3	1.18966	0.509356
3	1.27586	0.512219
3	1.36207	0.514389
3	1.44828	0.515968
3	1.53448	0.517039
3	1.62069	0.517675
3	1.7069	0.517936
3	1.7931	0.517875
3	1.87931	0.517536
3	1.96552	0.516957
3	2.05172	0.516173
3	2.13793	0.515211
3	2.22414	0.514097
3	2.31034	0.512852
3	2.39655	0.511494
3	2.48276	0.510041
3	2.56897	0.508506
3	2.65517	0.506903
3	2.74138	0.505241
3	2.82759	0.503532
3	2.91379	0.501782
3	3	0.5

## Sheet: table_2_1_overlap
a1	a2	a3	r1	r2	r3	u1	u2	u3
L	L	L	2	2	2	-1	-1	0
L	L	H	2.5	2.5	1	-1.5	-1.5	-1
L	H	L	2.5	1	2.5	-1.5	0	-0.5
L	H	H	3	1.5	1.5	-2	-0.5	-0.5
H	L	L	1	2.5	2.5	0	-1.5	-0.5
H	L	H	1.5	3	1.5	-0.5	-2	-0.5
H	H	L	1.5	1.5	3	-0.5	-0.5	-1
H	H	H	2	2	2	-1	-1	0
