# Supplementary material for: Targeted Position Games: A Framework for Strategic Rank Optimization in Competitive Environments
Source: Research Square preprint supplement (doi:10.21203/rs.3.rs-7880175/v1), 2025-11-10
Supplement: Supplementary file 1 [file eeab545b10056b719904512e.pdf]

## Supplementary Information

### Targeted Position Games: A Framework for Strategic Rank Optimization in Competitive Environments

Author: Esmaeil Farshi Haghro

Journal: Scientific Reports (Nature Portfolio)

Submission ID: e071f2a0-0c59-4945-99ed-6757f63bc192

Date: 2025-10-21

Contents: Supplementary Methods; Figures S1-S2; Data dictionary and replication notes.

Companion workbook: TPG\_SuppData.xlsx (all source data).

## Data Availability

All synthetic data and code used to generate the figures and numerical results are provided in this Supplementary Information and in the companion Excel workbook TPG\_SuppData.xlsx. Third-party datasets referenced for illustration are under license and are not redistributed here; they can be obtained from their providers with appropriate permissions or from the authors upon reasonable request.

## Supplementary Methods

Ranking and Tie-Break: Scores are ordered descending; ranks are 1=best. Ties receive the average rank.

Figure S1 Simulations:  $n=6$ ; baseline scores proportional to  $(n - \text{target} + 1)$ ; Gaussian noise  $\sigma=0.35$ ; 4,000 draws; seed fixed.

Overlap case duplicates target rank 1; avoidance case reduces one overlapping player's baseline by 0.75.

Overlap Dashboard (Figure S2):  $n=3$ , actions  $\{L,H\}$  with scores  $L \rightarrow 1$ ,  $H \rightarrow 2$ . For each target case we draw 1,000

high-effort costs  $k \sim U[0,1]$  and test PSNE existence by brute force over  $2^3$  profiles.

Lower bound on misalignment is

$\min \sum |R_i - t_i|$  across the same profiles.

PL Threshold Grid (Appendix A): For  $\theta = \exp(h/\beta)$  in  $[1.05, 3.0]$  and third-player weight  $c$  in  $[0.5, 3.0]$ , we compute

$$k^*(\theta, c) = [c^2(\theta-1) + 3c(\theta^2-1) + (\theta^2-\theta)] / [2(c^2\theta + c^2 + c\theta^2 + 2c\theta + c + \theta^2 + \theta)].$$

Figure S1 — Rank Deviation Density (Distinct targets)

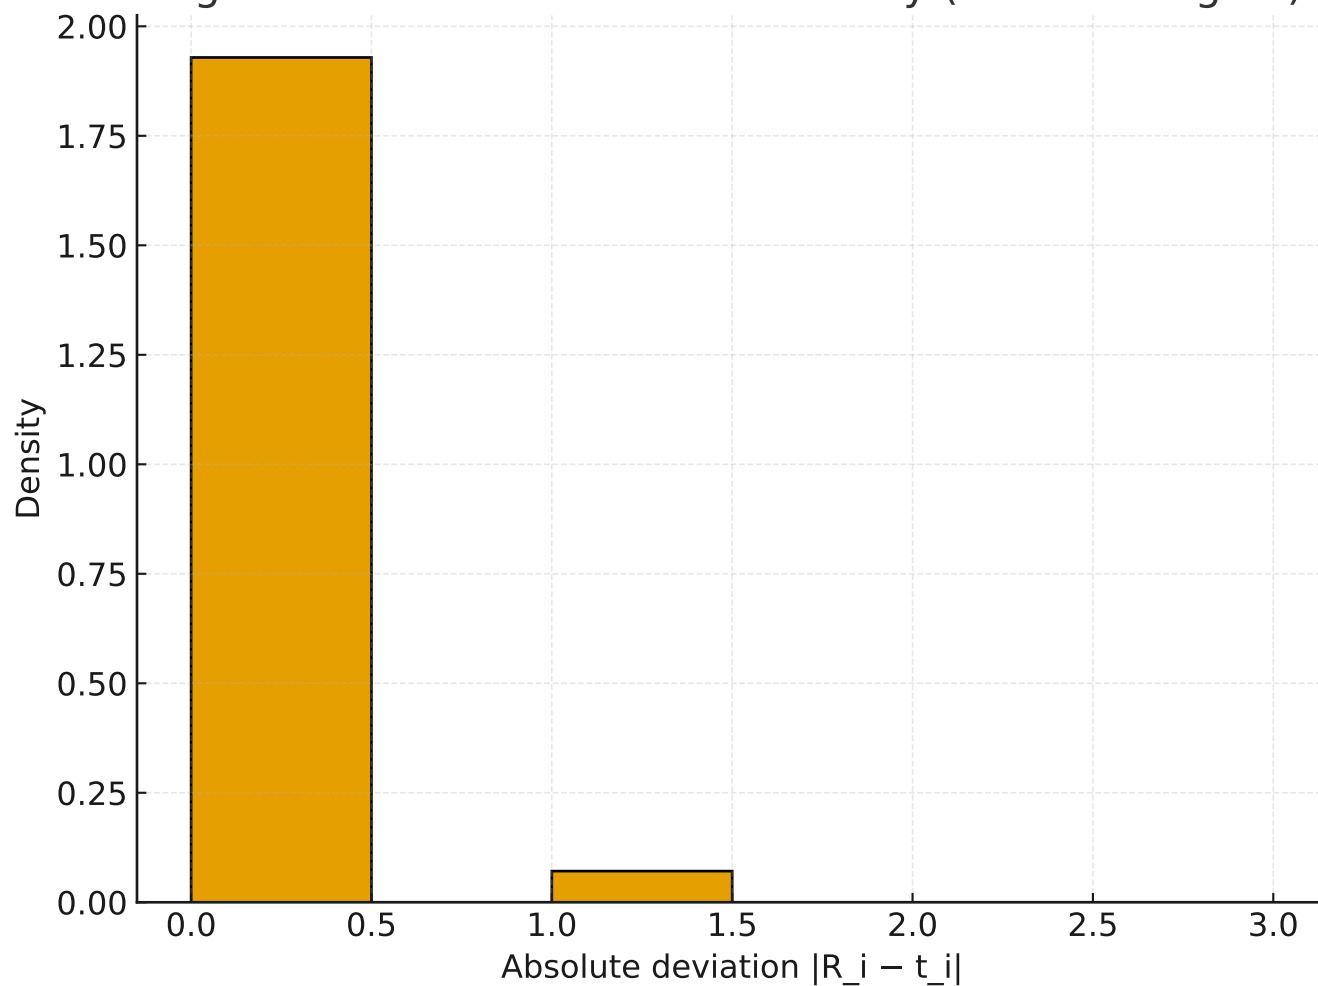

Figure S1 — Rank Deviation Density (Overlap at top (two players target 1

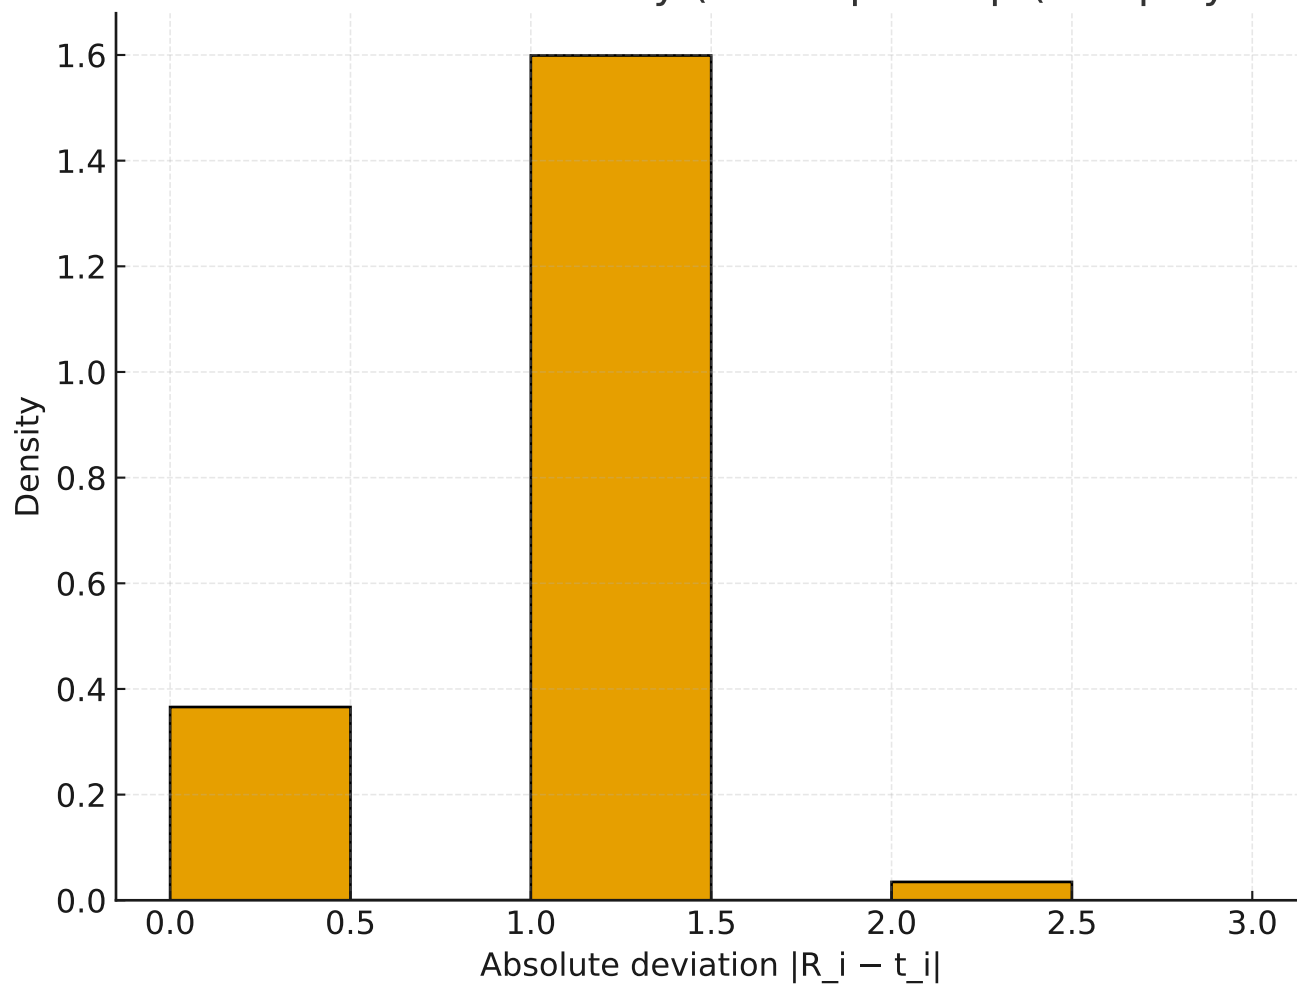

Figure S1 — Rank Deviation Density (Overlap + mild avoidance)

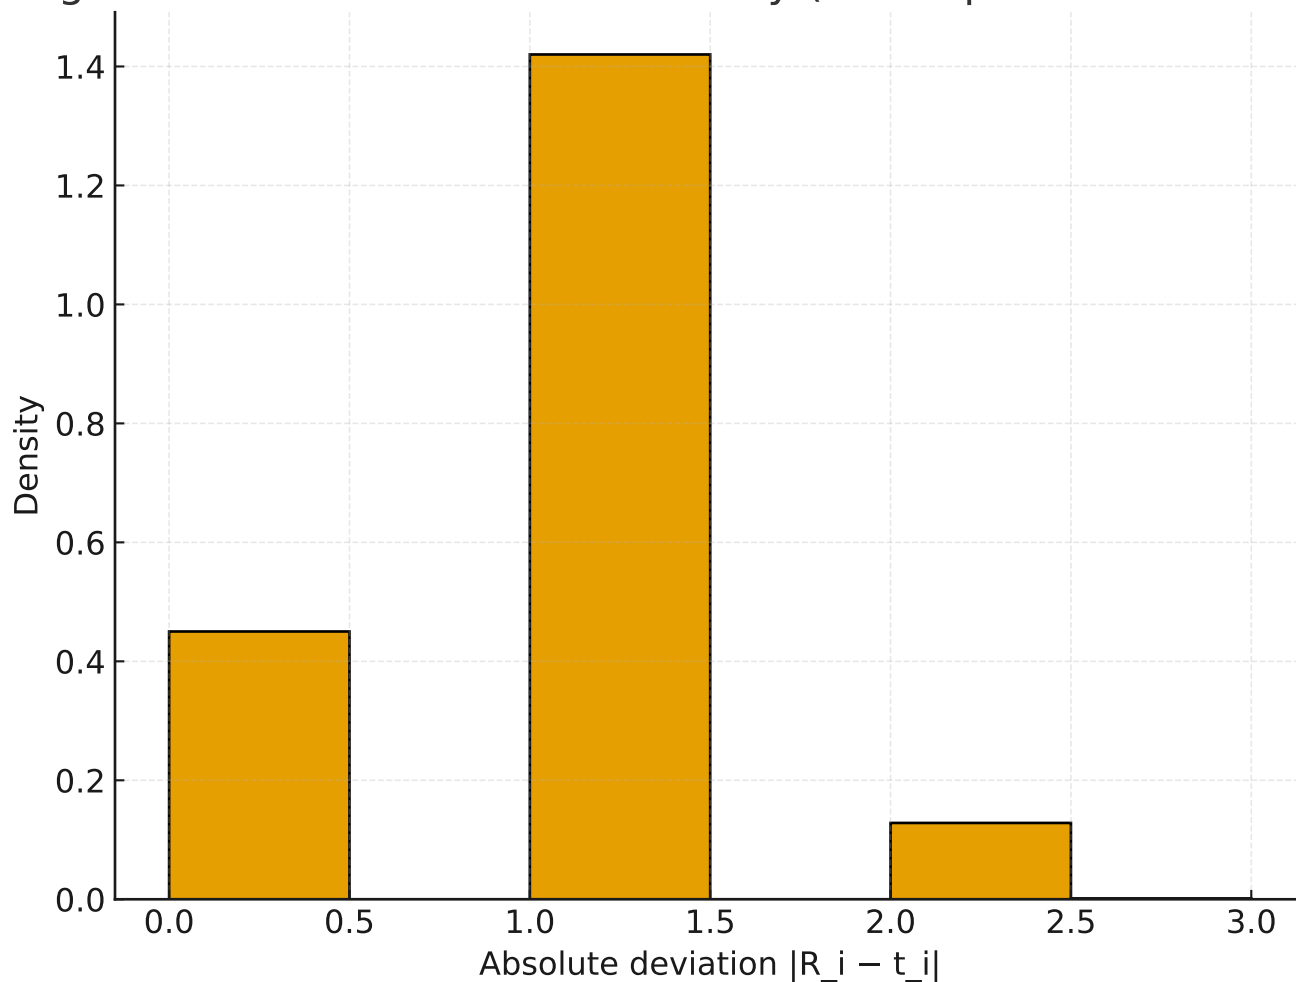

Figure S2a — PSNE Frequency vs Overlap Density  $\rho$  ( $n=3$ )

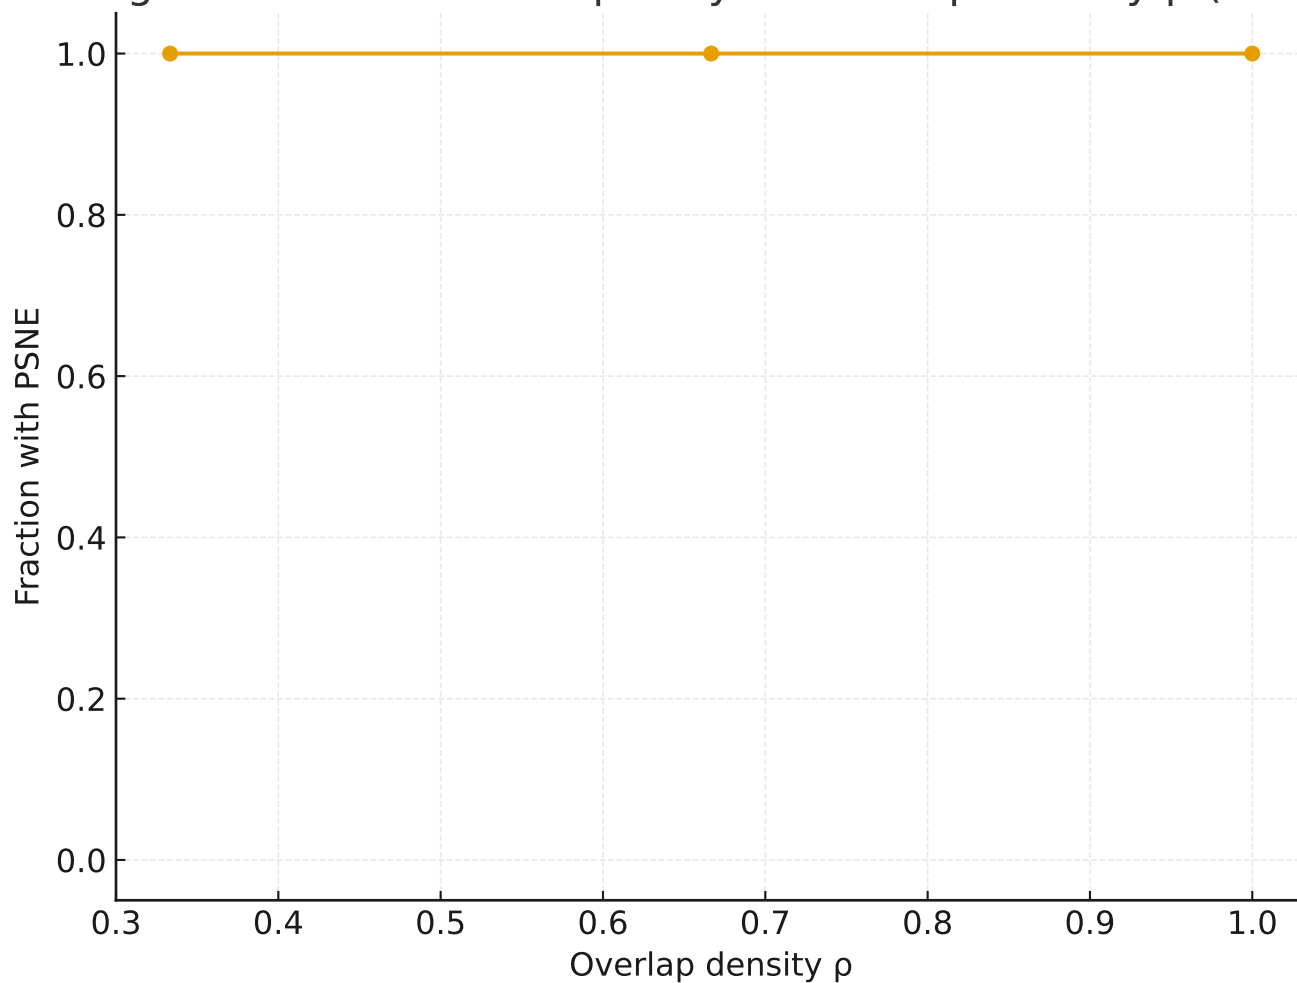

Figure S2b — Lower Bound on Misalignment:  $\min \sum |R_i - t_i|$  ( $n=3$ )

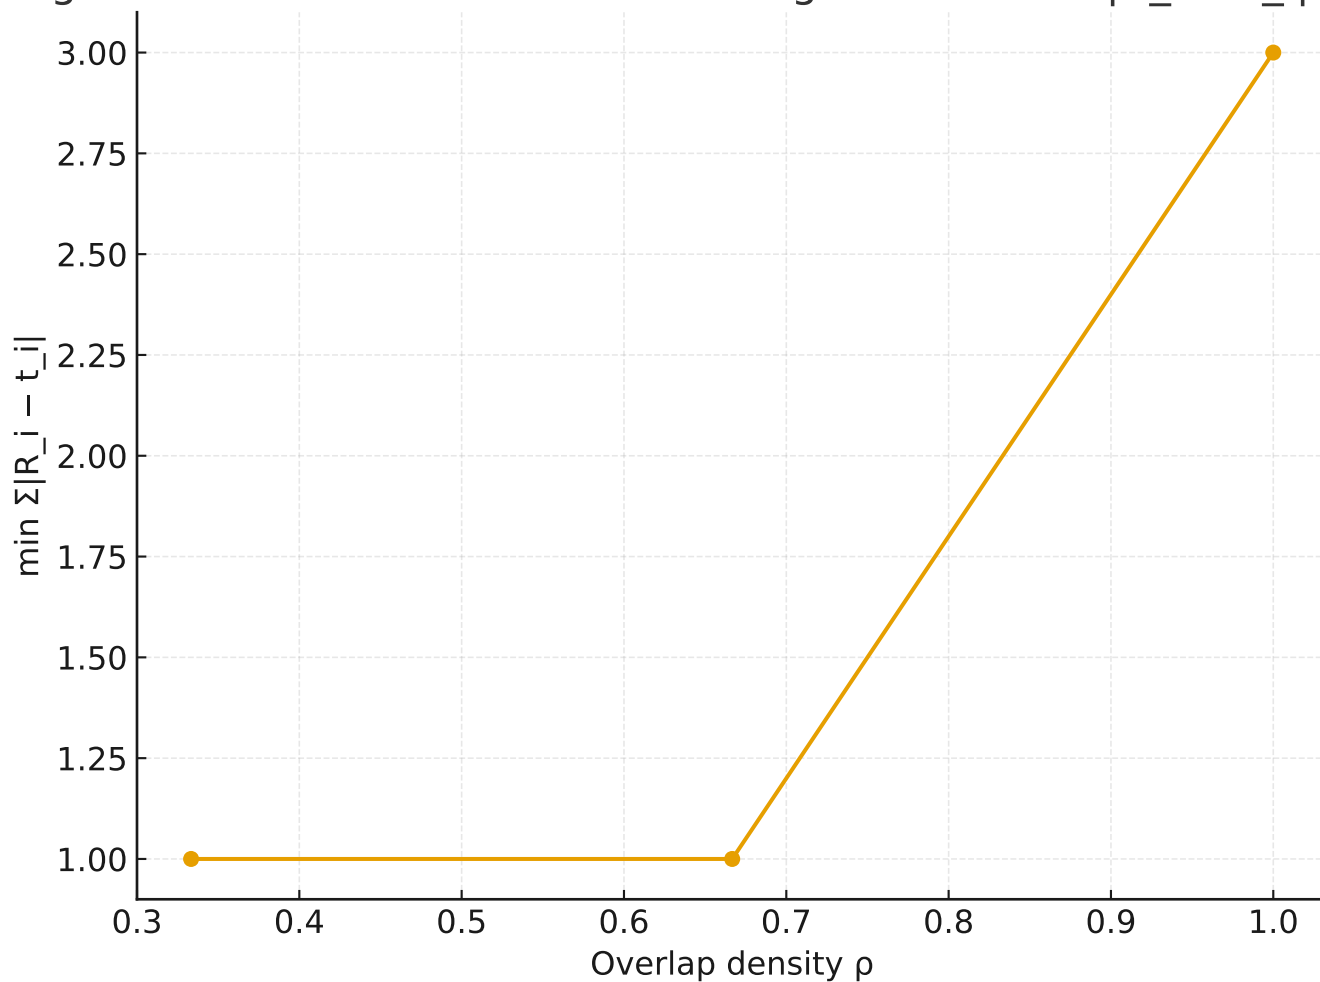



## Data Dictionary & Replication Notes

- rank\_densities (Excel Sheet): scenario, n, sigma, seed, abs\_deviation — per-agent  $|R_i - t_i|$ .
- psne\_freq\_vs\_rho (Sheet): case\_name, rho, k\_samples, psne\_count, psne\_frequency.
- min\_total\_dev\_vs\_rho (Sheet): case\_name, rho, min\_total\_deviation.
- pl\_threshold\_grid (Sheet): theta, c, k\_star.
- table\_2\_1\_overlap (Sheet): actions (a1,a2,a3), ranks (r1,r2,r3), cost-free utilities (u1,u2,u3).

Environment: Python 3.10+, numpy, pandas, matplotlib; random seeds fixed. See README in the data package.
